# Supplementary material for: Elastomeric polyamide biomaterials with stereochemically tuneable mechanical properties and shape memory
Source: PubMed Central journal article supplement (PMC7320000; doi:10.1038/s41467-020-16945-8), 2020-06-26
Supplement: 41467_2020_16945_MOESM1_ESM.pdf [file 41467_2020_16945_MOESM1_ESM.pdf]

# **Supplementary Information**

## **Elastomeric Polyamide Biomaterials with Stereochemically Tuneable Mechanical Properties and Shape Memory**

Worch et. al.

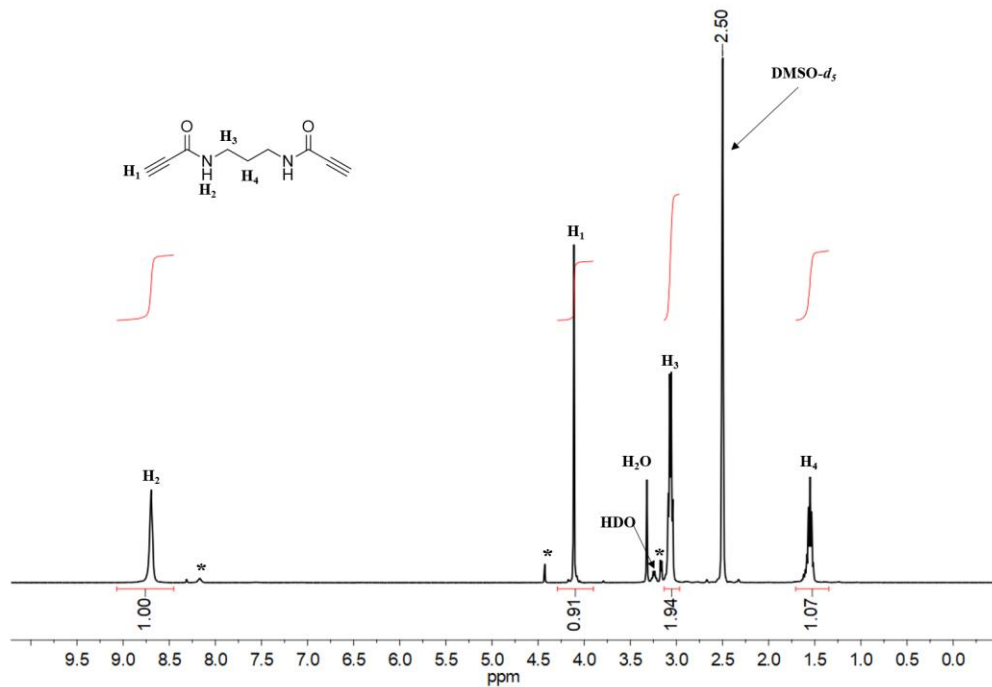

**Supplementary Figure 1.** Dipropiolamide (C<sub>3</sub>A) <sup>1</sup>H NMR Spectrum – 400 MHz, DMSO-*d*<sub>6</sub>. \* = signals from rotamer

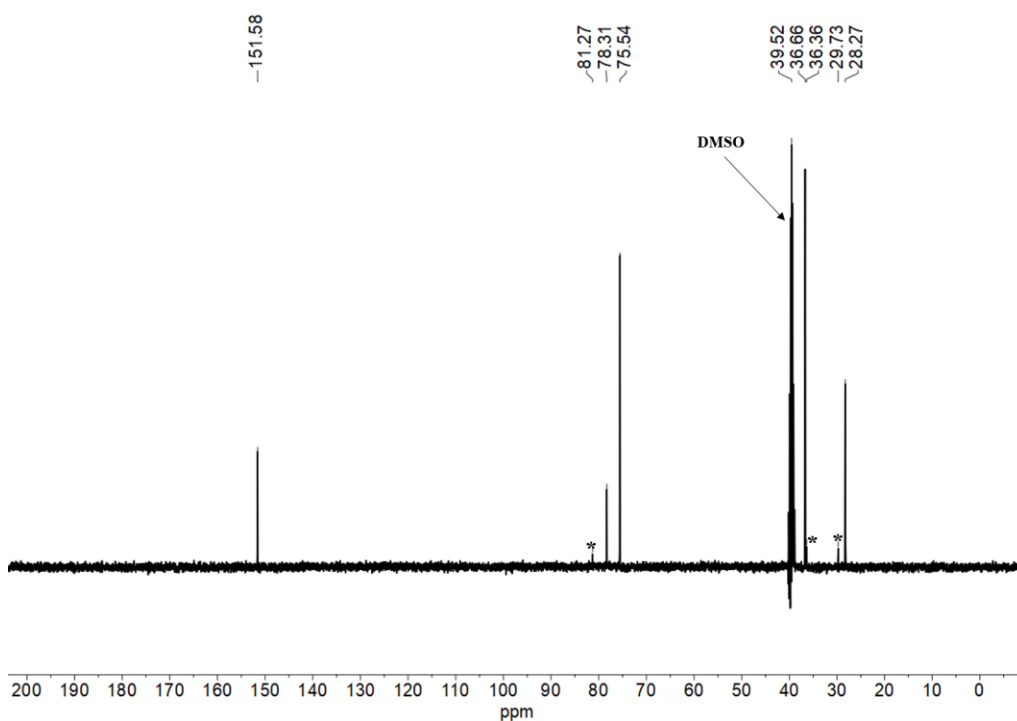

**Supplementary Figure 2.** Dipropiolamide (C<sub>3</sub>A) <sup>13</sup>C NMR Spectrum – 101 MHz, DMSO-*d*<sub>6</sub>. \* = signals from rotamer

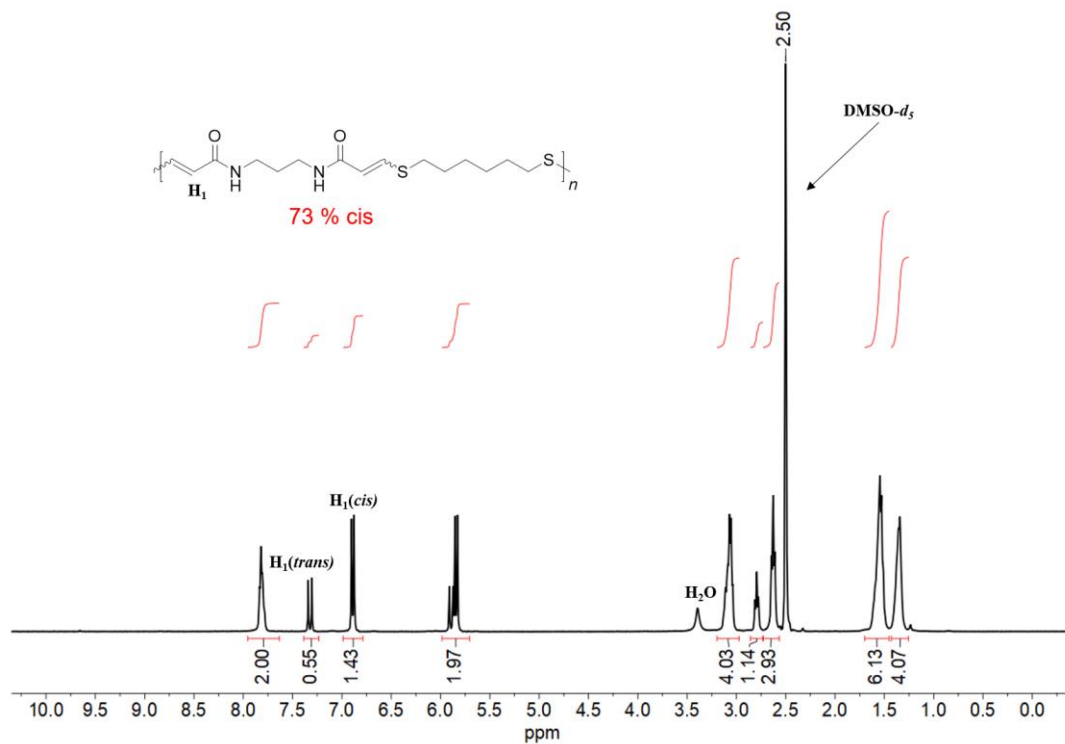

**Supplementary Figure 3.**  $\text{C}_3\text{A-C}_6\text{T}$  73% *cis*  $^1\text{H}$  NMR Spectrum – 400 MHz,  $\text{DMSO-}d_6$ .

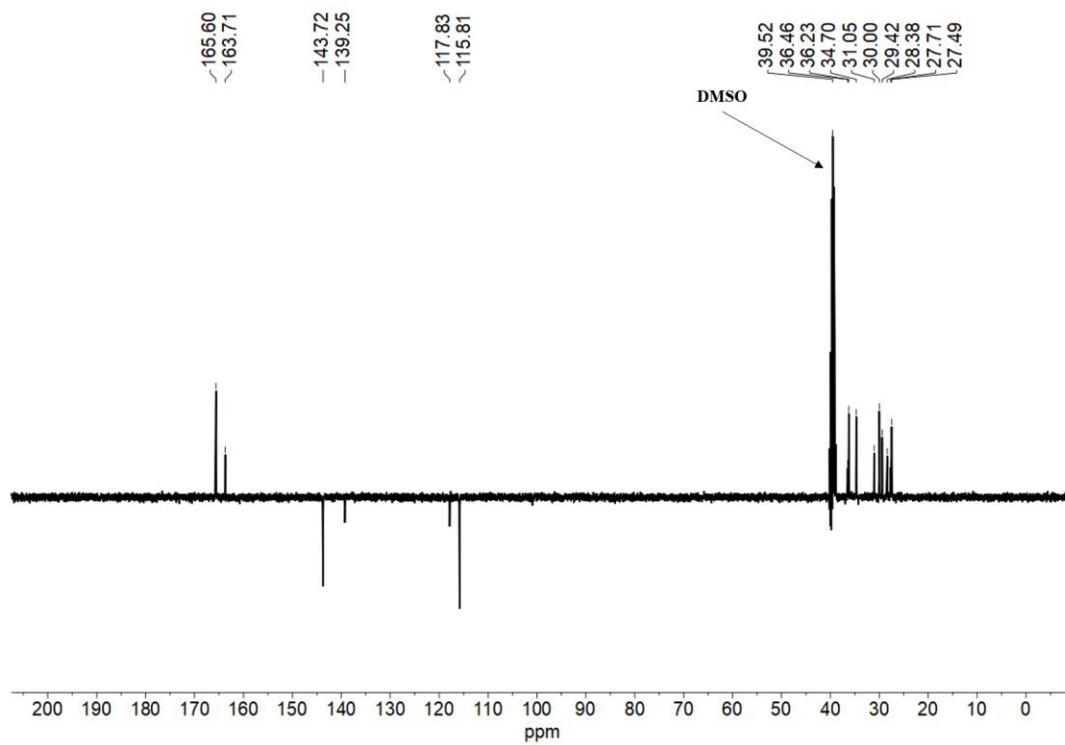

**Supplementary Figure 4.**  $\text{C}_3\text{A-C}_6\text{T}$  73% *cis*  $^{13}\text{C}$  NMR Spectrum – 101 MHz,  $\text{DMSO-}d_6$ .

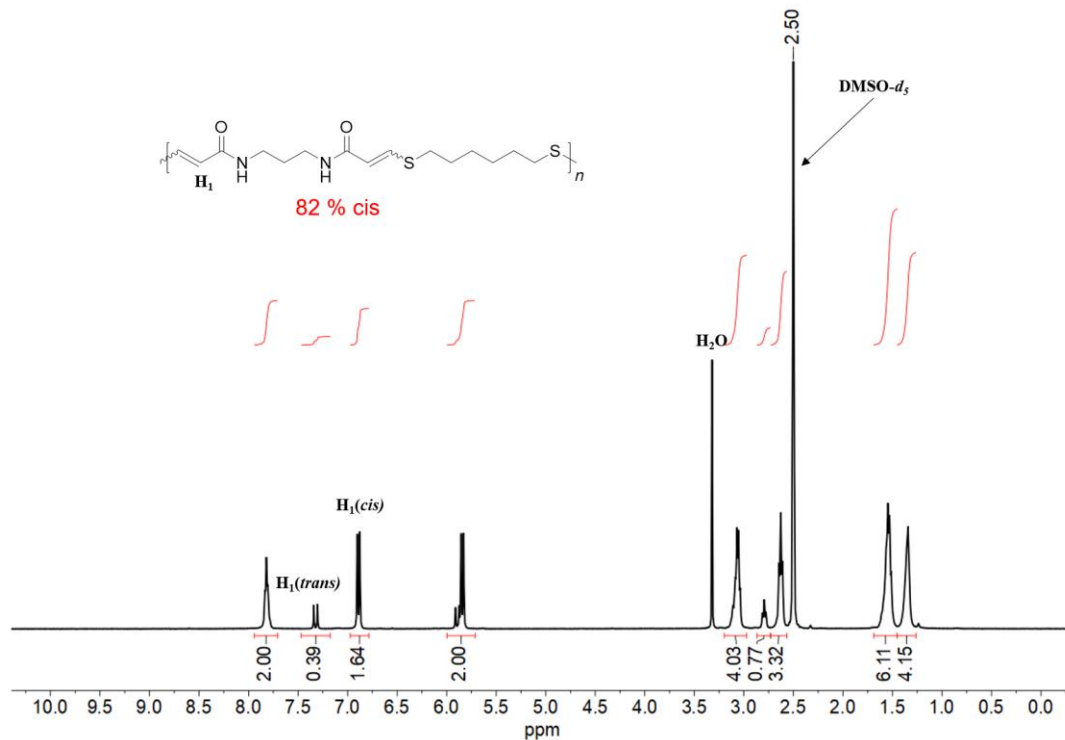

**Supplementary Figure 5.** C<sub>3</sub>A-C<sub>6</sub>T 82% *cis* <sup>1</sup>H NMR Spectrum – 400 MHz, DMSO-*d*<sub>6</sub>.

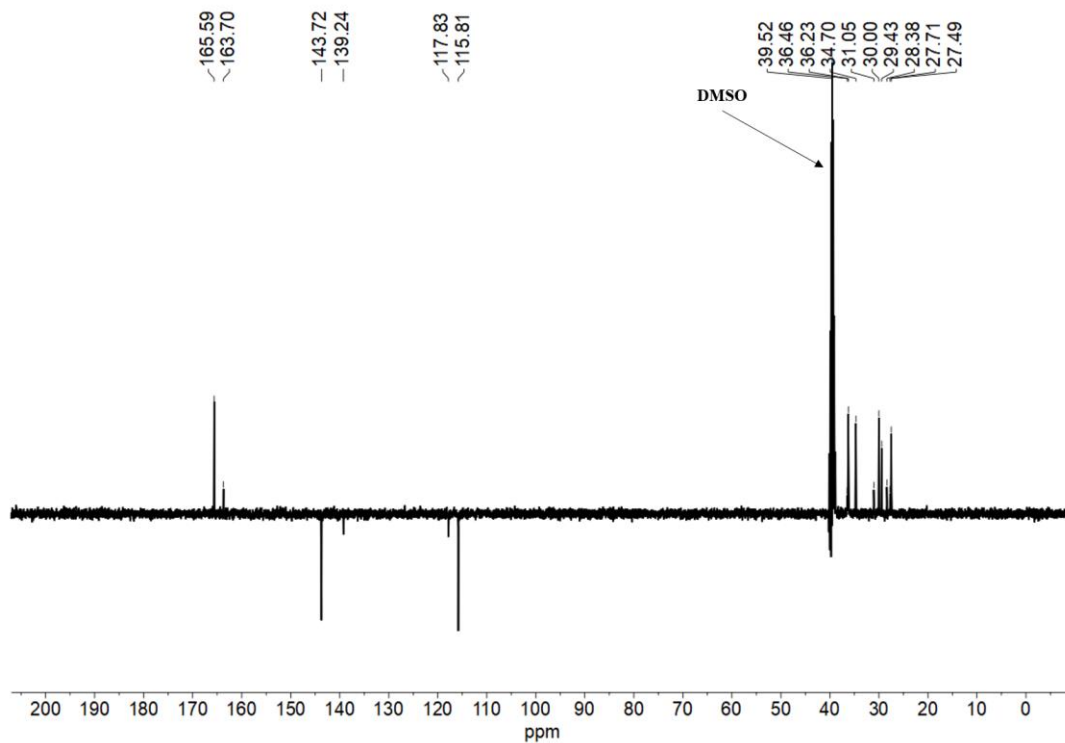

**Supplementary Figure 6.** C<sub>3</sub>A-C<sub>6</sub>T 82% *cis* <sup>13</sup>C NMR Spectrum – 101 MHz, DMSO-*d*<sub>6</sub>.

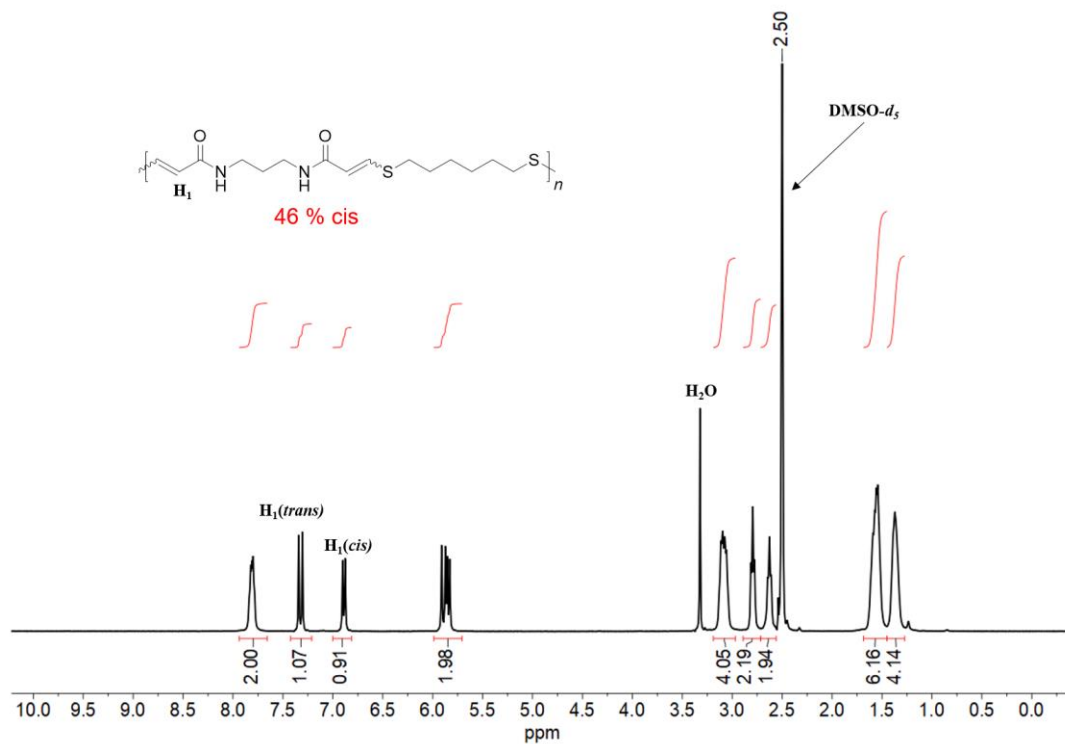

**Supplementary Figure 7.** C<sub>3</sub>A-C<sub>6</sub>T 46% *cis* <sup>1</sup>H NMR Spectrum – 400 MHz, DMSO-*d*<sub>6</sub>.

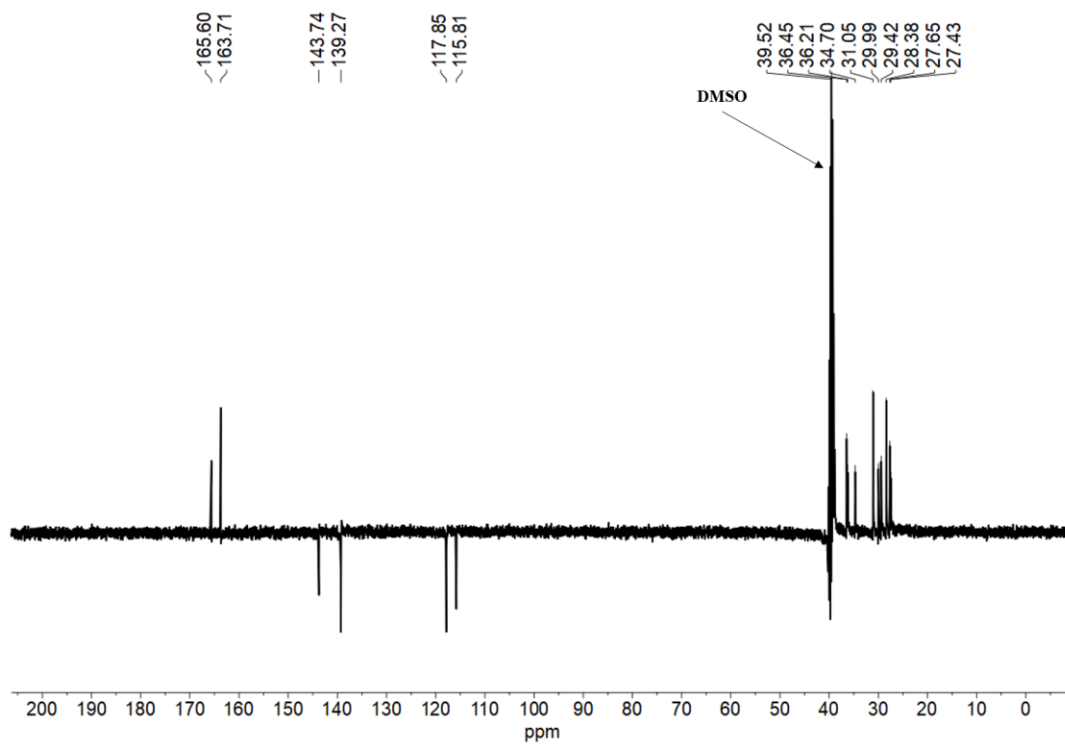

**Supplementary Figure 8.** C<sub>3</sub>A-C<sub>6</sub>T 46% *cis* <sup>13</sup>C NMR Spectrum – 101 MHz, DMSO-*d*<sub>6</sub>.

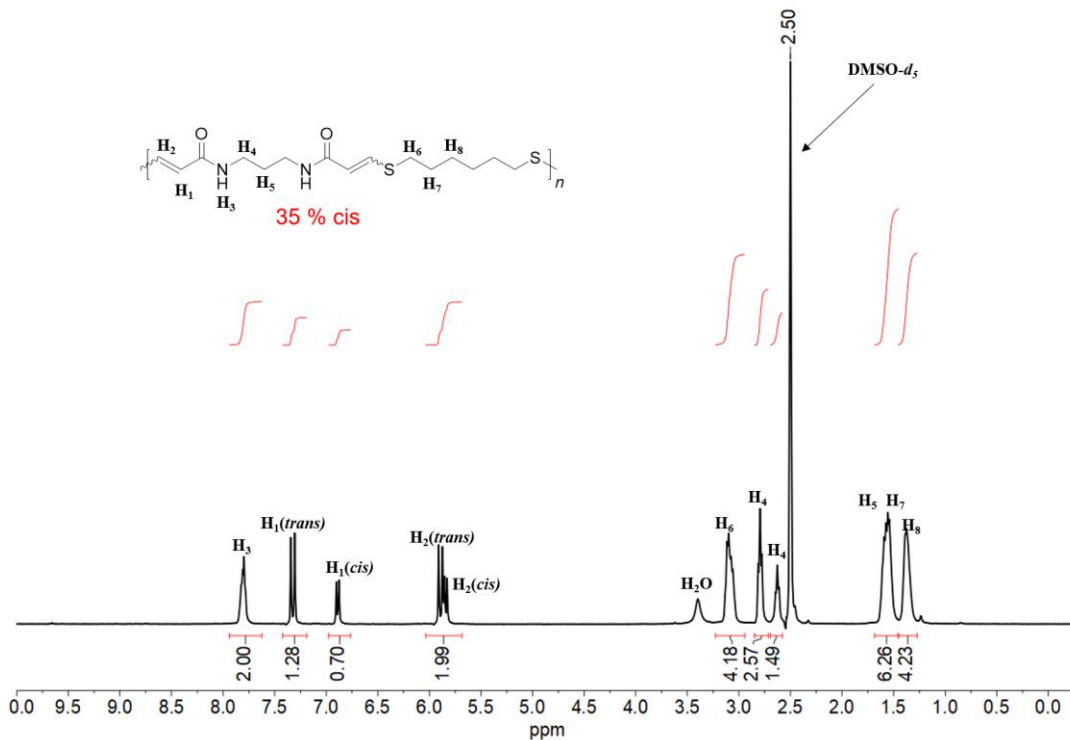

**Supplementary Figure 9.** C<sub>3</sub>A-C<sub>6</sub>T 35% *cis* <sup>1</sup>H NMR Spectrum – 400 MHz, DMSO-*d*<sub>6</sub>.

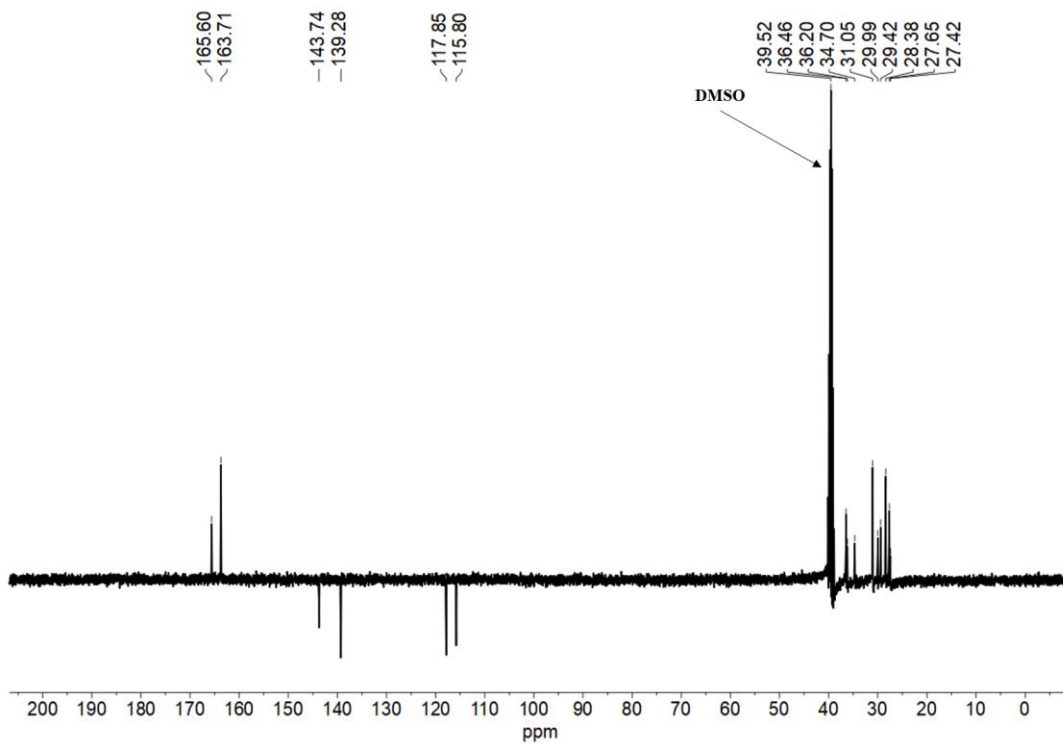

**Supplementary Figure 10.** C<sub>3</sub>A-C<sub>6</sub>T 35% *cis* <sup>13</sup>C NMR Spectrum – 101 MHz, DMSO-*d*<sub>6</sub>.

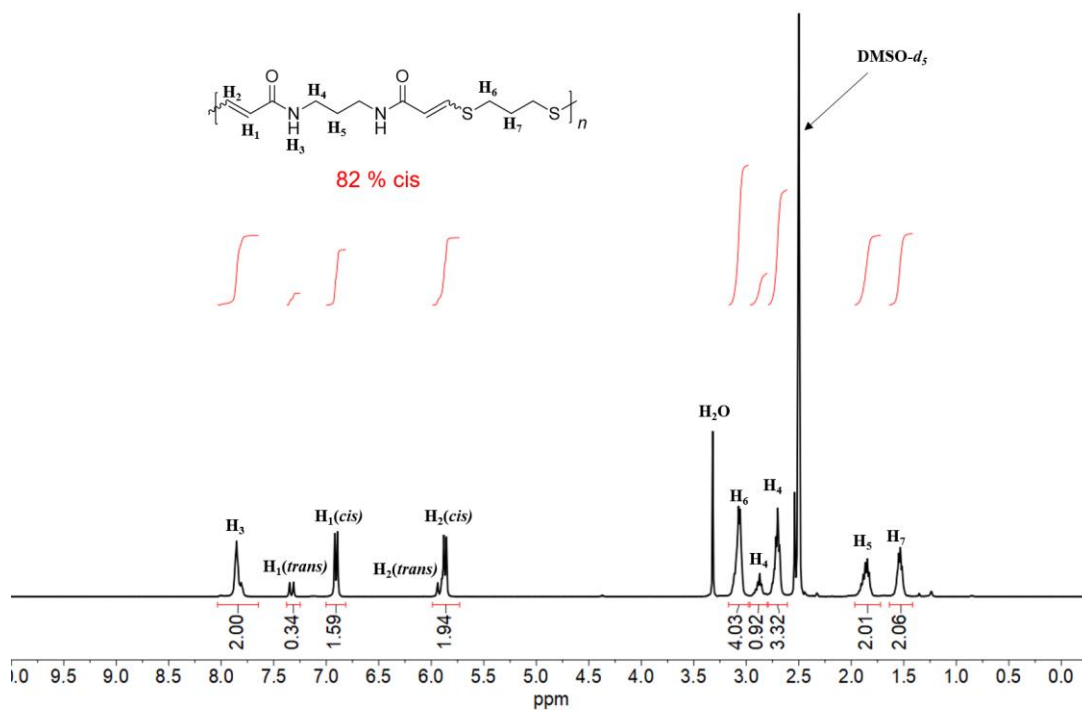

Supplementary Figure 11. C<sub>3</sub>A-C<sub>3</sub>T 82% *cis* <sup>1</sup>H NMR Spectrum – 400 MHz, DMSO-*d*<sub>6</sub>.

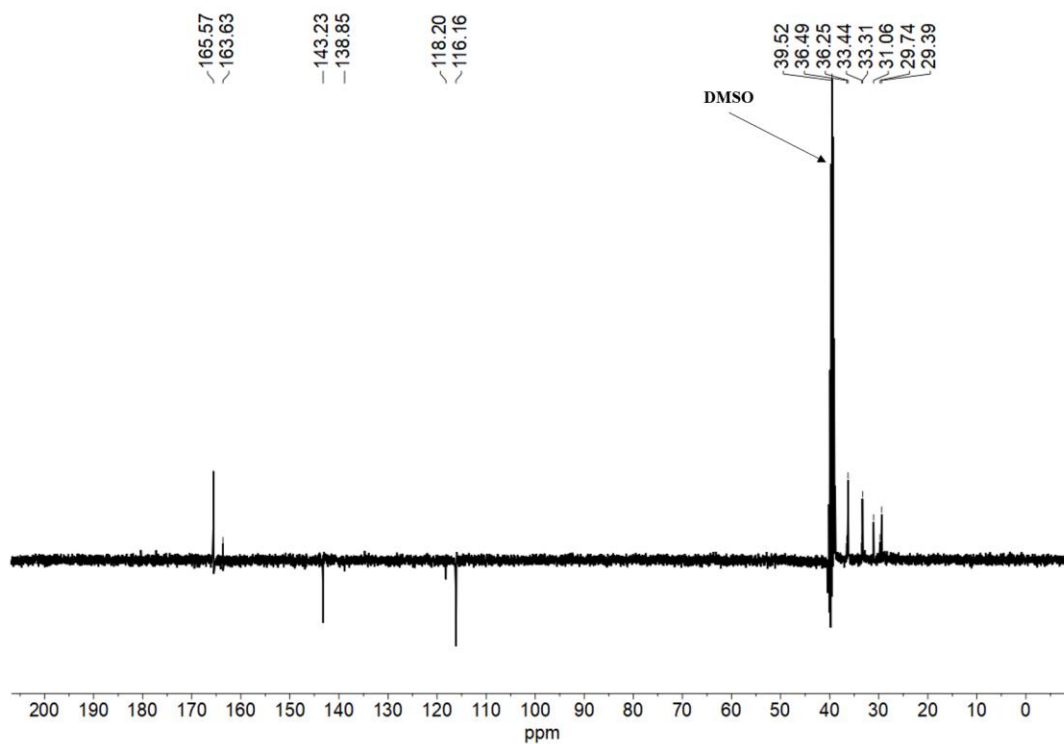

Supplementary Figure 12. C<sub>3</sub>A-C<sub>3</sub>T 82% *cis* <sup>13</sup>C NMR Spectrum – 101 MHz, DMSO-*d*<sub>6</sub>.

**Supplementary Note 1.** C<sub>3</sub>A-C<sub>3</sub>T 82% *cis* <sup>1</sup>H NMR and <sup>13</sup>C NMR assignments.

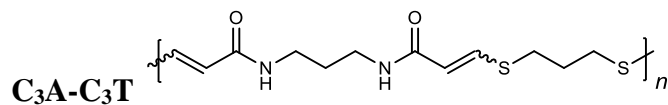

<sup>1</sup>H NMR (400 MHz, DMSO-*d*<sub>6</sub>) δ 7.85 (t, *J* = 5.6 Hz, *cis* + *trans* overlapping, 2H), 7.80 (t, *J* = 5.3 Hz, *trans*), 7.33 (d, *J* = 14.9 Hz, *trans*), 6.91 (d, *J* = 10.0 Hz, *cis* 2H), 5.92 (d, *J* = 14.7 Hz, *trans*), 5.88 (d, *J* = 10.0 Hz, *cis* 2H), 3.15 – 3.03 (m, *cis* + *trans* overlapping, 4H), 2.87 (t, *J* = 7.4 Hz, *trans*), 2.70 (t, *J* = 7.3 Hz, *cis* 4H), 1.87 (dt, *J* = 15.0, 7.6 Hz, 2H), 1.54 (m, 2H). <sup>13</sup>C NMR (101 MHz, DMSO-*d*<sub>6</sub>) δ 165.57<sub>*cis*</sub>, 163.63<sub>*trans*</sub>, 143.23<sub>*cis*</sub>, 138.85<sub>*trans*</sub>, 118.20<sub>*trans*</sub>, 116.16<sub>*cis*</sub>, 36.49<sub>*trans*</sub>, 36.25<sub>*cis*</sub>, 33.44<sub>*trans*</sub>, 33.31<sub>*cis*</sub>, 31.05, 29.74<sub>*trans*</sub>, 29.39<sub>*cis*</sub>.

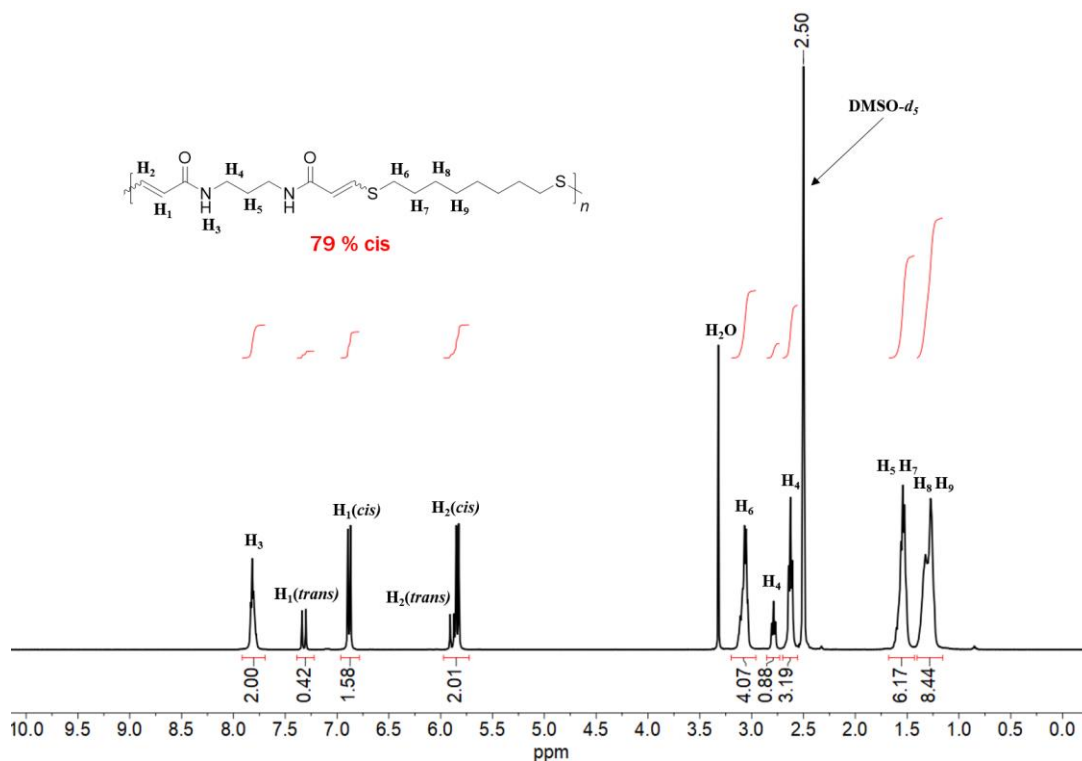

**Supplementary Figure 13.** C<sub>3</sub>A-C<sub>8</sub>T 79% *cis* <sup>1</sup>H NMR Spectrum – 400 MHz, DMSO-*d*<sub>6</sub>.



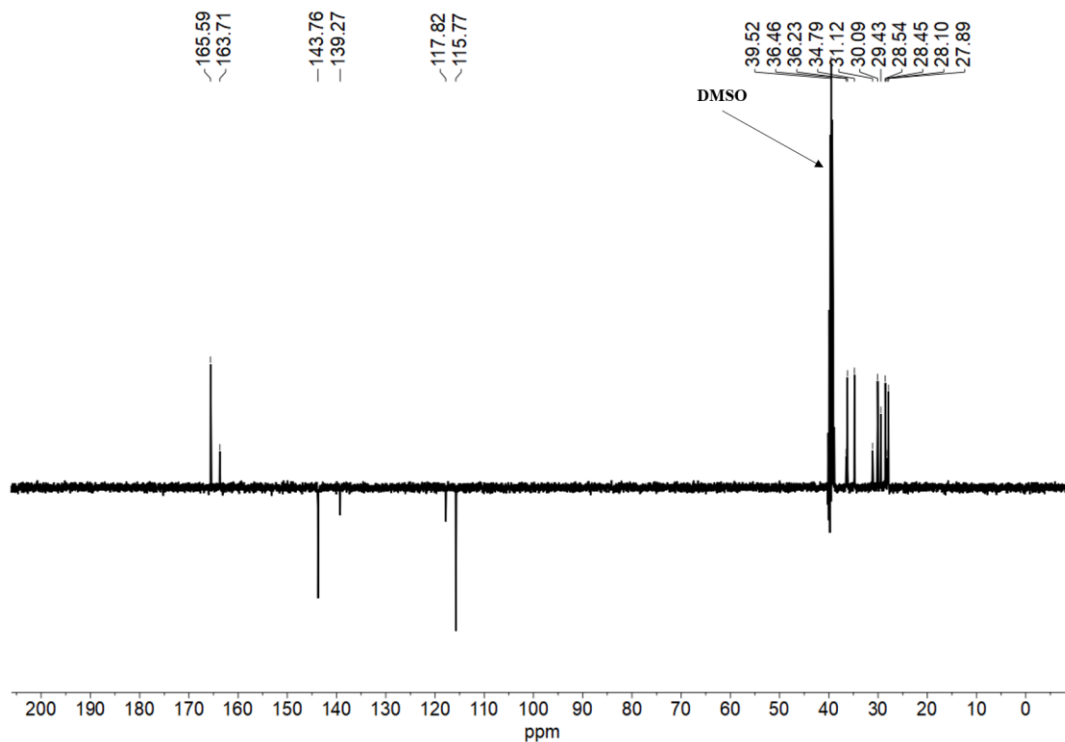

**Supplementary Figure 14.** C<sub>3</sub>A-C<sub>8</sub>T 79% *cis* <sup>13</sup>C NMR Spectrum – 101 MHz, DMSO-*d*<sub>6</sub>.

**Supplementary Note 2.** C<sub>3</sub>A-C<sub>8</sub>T 79% *cis* <sup>1</sup>H NMR and <sup>13</sup>C NMR assignments.

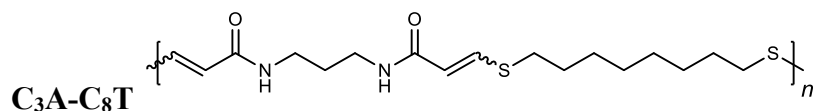

<sup>1</sup>H NMR (400 MHz, DMSO-*d*<sub>6</sub>) δ 7.82 (t, *J* = 5.6 Hz, *cis* + *trans* overlapping 2H), 7.32 (d, *J* = 15.0 Hz, *trans*), 6.88 (d, *J* = 10.1 Hz, 2H), 5.89 (d, *J* = 15.0 Hz, *trans*), 5.84 (d, *J* = 10.0 Hz, *cis*, 2H), 3.16 – 3.00 (m, *cis* + *trans* overlapping, 4H), 2.79 (t, *J* = 7.3 Hz, *trans*), 2.62 (t, *J* = 7.3 Hz, *cis*, 4H), 1.63 – 1.48 (m, 6H), 1.42 – 1.20 (m, 8H). <sup>13</sup>C NMR (101 MHz, DMSO-*d*<sub>6</sub>) δ 165.59<sub>*cis*</sub>, 163.71<sub>*trans*</sub>, 143.76<sub>*cis*</sub>, 139.27<sub>*trans*</sub>, 117.82<sub>*trans*</sub>, 115.77<sub>*cis*</sub>, 36.46<sub>*trans*</sub>, 36.23<sub>*cis*</sub>, 34.79, 31.12<sub>*trans*</sub>, 30.09<sub>*cis*</sub>, 29.43<sub>*cis*</sub>, 28.54, 28.45<sub>*trans*</sub>, 28.10<sub>*trans*</sub>, 27.89<sub>*cis*</sub>.

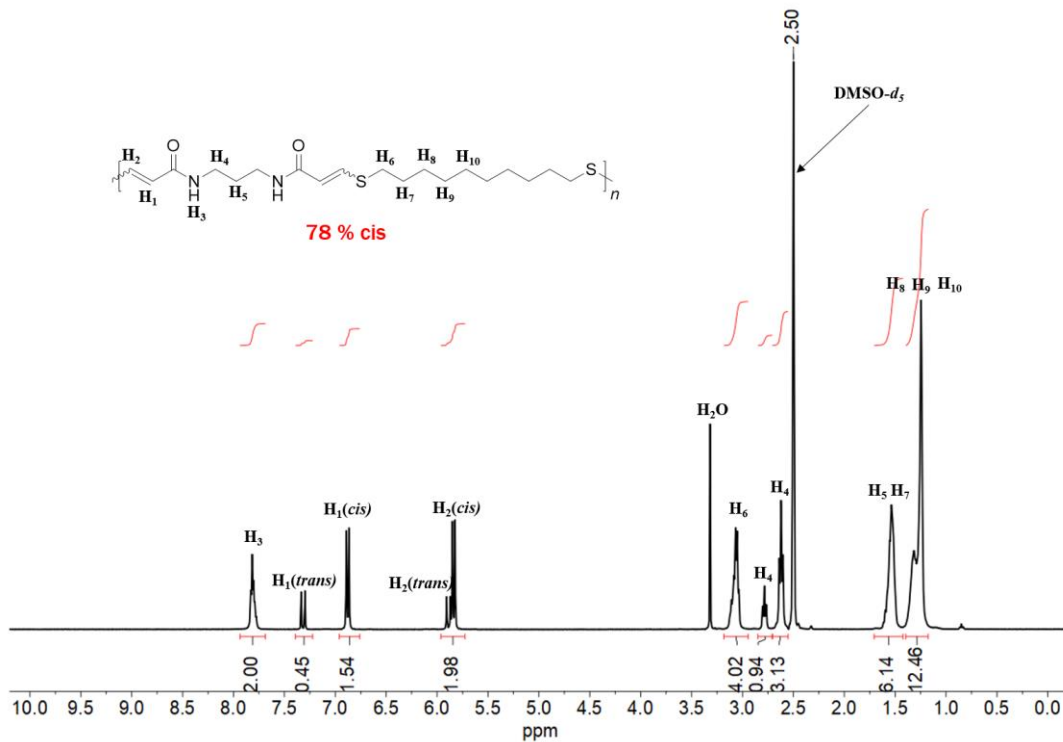

Supplementary Figure 15. C<sub>3</sub>A-C<sub>10</sub>T 78% *cis* <sup>1</sup>H NMR Spectrum – 400 MHz, DMSO-*d*<sub>6</sub>.

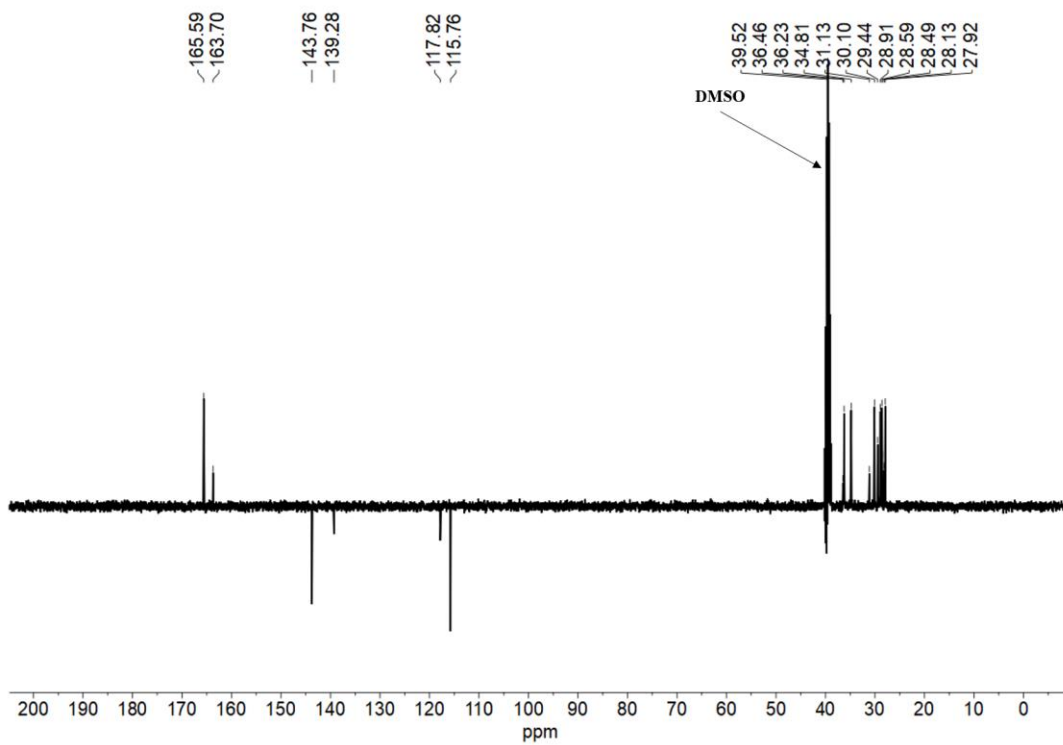

Supplementary Figure 16. C<sub>3</sub>A-C<sub>10</sub>T 78% *cis* <sup>13</sup>C NMR Spectrum – 101 MHz, DMSO-*d*<sub>6</sub>.

**Supplementary Note 3.** C<sub>3</sub>A-C<sub>10</sub>T 78% *cis* <sup>1</sup>H NMR and <sup>13</sup>C NMR assignments.

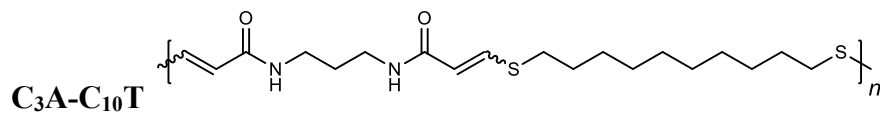

<sup>1</sup>H NMR (400 MHz, DMSO-*d*<sub>6</sub>) δ 7.82 (t, *J* = 5.6 Hz, *cis* + *trans* overlapping, 2H), 7.32 (d, *J* = 15.0 Hz, *trans*), 6.88 (d, *J* = 10.1 Hz, *cis*, 2H), 5.89 (d, *J* = 15.0 Hz, *trans*), 5.84 (d, *J* = 10.0 Hz, *cis*, 2H), 3.17 – 2.99 (m, *cis* + *trans* overlapping, 4H), 2.78 (t, *J* = 7.3 Hz, *trans*), 2.62 (t, *J* = 7.3 Hz, *cis*, 2H), 1.63 – 1.44 (m, 6H), 1.40 – 1.17 (m, 12H). <sup>13</sup>C NMR (101 MHz, DMSO-*d*<sub>6</sub>) δ 165.59<sub>*cis*</sub>, 163.70<sub>*trans*</sub>, 143.76<sub>*cis*</sub>, 139.28<sub>*trans*</sub>, 117.82<sub>*trans*</sub>, 115.76<sub>*cis*</sub>, 36.46<sub>*trans*</sub>, 36.23<sub>*cis*</sub>, 34.81, 31.13<sub>*trans*</sub>, 30.10<sub>*cis*</sub>, 29.44<sub>*cis*</sub>, 28.91, 28.59, 28.51<sub>*trans*</sub>, 28.13<sub>*trans*</sub>, 27.92<sub>*cis*</sub>.

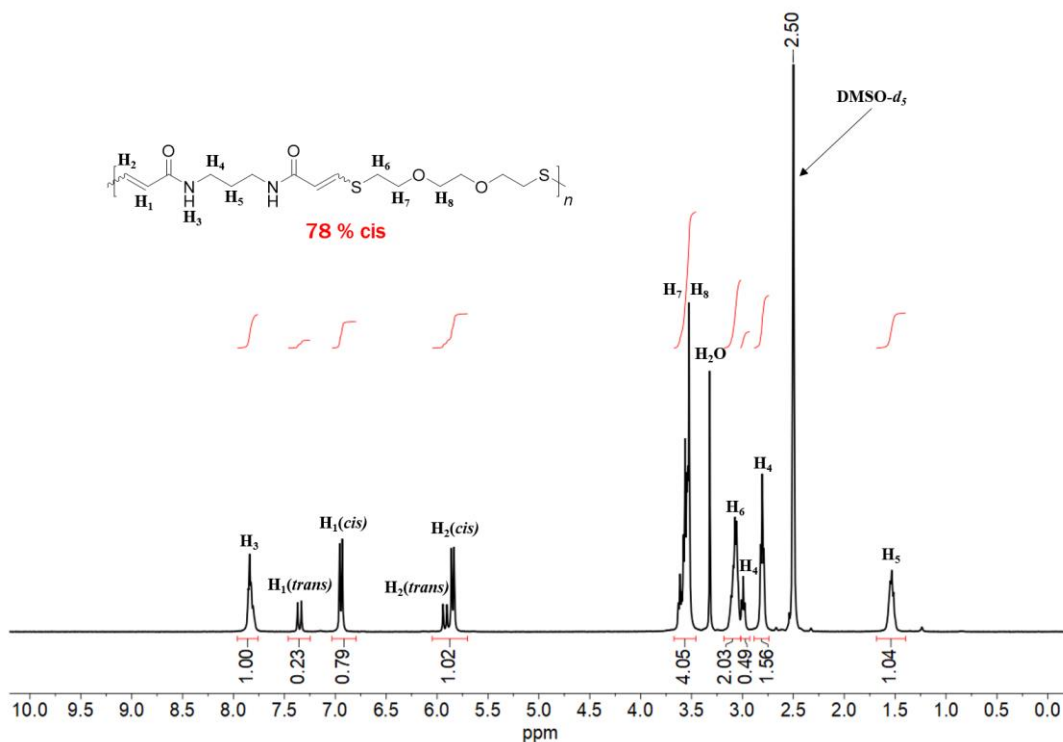

**Supplementary Figure 17.** C<sub>3</sub>A-C<sub>DEGT</sub> 78% *cis* <sup>1</sup>H NMR Spectrum – 400 MHz, DMSO-*d*<sub>6</sub>.

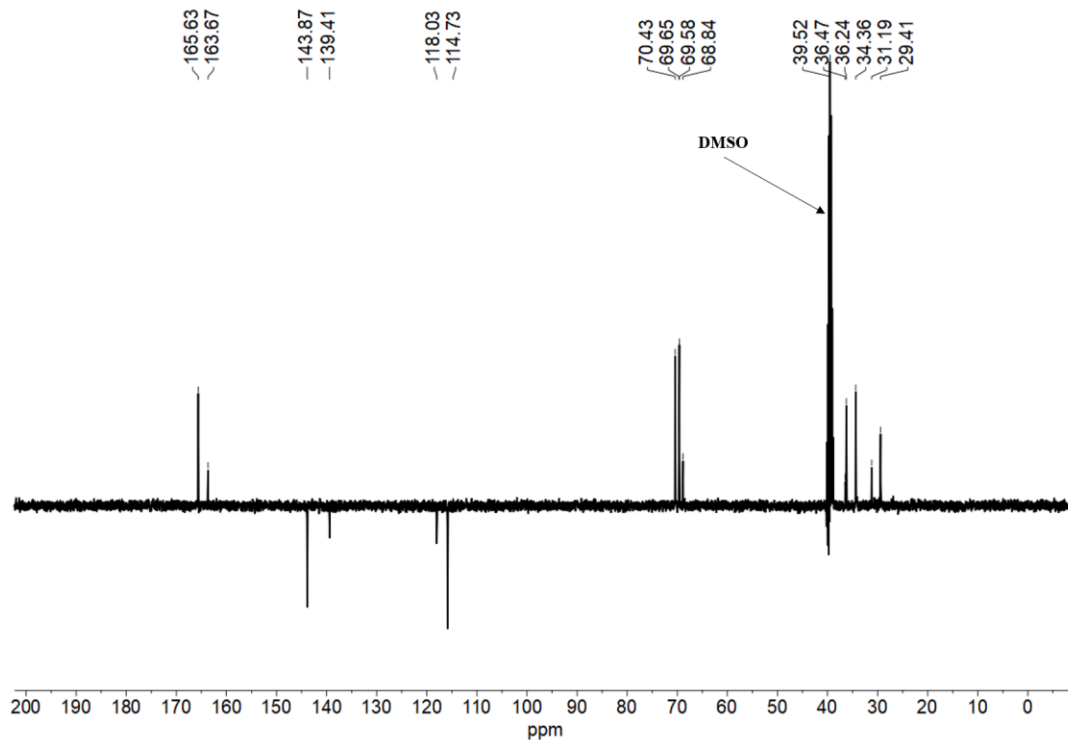

**Supplementary Figure 18.** C<sub>3</sub>A-C<sub>DEGT</sub> 78% *cis* <sup>13</sup>C NMR Spectrum – 101 MHz, DMSO-*d*<sub>6</sub>.

**Supplementary Note 4.** C<sub>3</sub>A-C<sub>DEGT</sub> 78% *cis* <sup>1</sup>H NMR and <sup>13</sup>C NMR assignments.

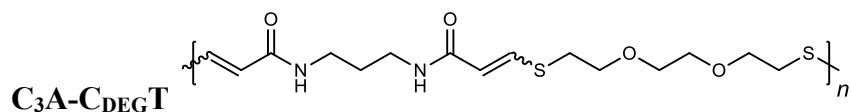

<sup>1</sup>H NMR (400 MHz, DMSO-*d*<sub>6</sub>) δ 7.84 (t, *J* = 5.9 Hz, *cis* + *trans* overlapping, 2H), 7.35 (d, *J* = 15.0 Hz, *trans*), 6.94 (d, *J* = 10.0 Hz, *cis*, 2H), 5.92 (d, *J* = 15.0 Hz, *trans*), 5.84 (d, *J* = 10.1, *cis*, 2H), 3.64 – 3.48 (m, *cis* + *trans* overlapping, 8H), 3.07 (m, *cis* + *trans* overlapping, 4H), 2.99 (t, *J* = 6.4 Hz, *trans*), 2.81 (t, *J* = 6.7 Hz, *cis*, 4H), 1.58 – 1.49 (m, 2H). <sup>13</sup>C NMR (101 MHz, DMSO-*d*<sub>6</sub>) δ 165.63<sub>*cis*</sub>, 163.67<sub>*trans*</sub>, 143.87<sub>*cis*</sub>, 139.41<sub>*trans*</sub>, 118.03<sub>*trans*</sub>, 114.73<sub>*cis*</sub>, 70.43<sub>*cis*</sub>, 69.65<sub>*trans*</sub>, 69.58<sub>*cis*</sub>, 68.84<sub>*trans*</sub>, 36.47<sub>*trans*</sub>, 36.24<sub>*cis*</sub>, 34.36, 31.19<sub>*trans*</sub>, 29.41<sub>*cis*</sub>.

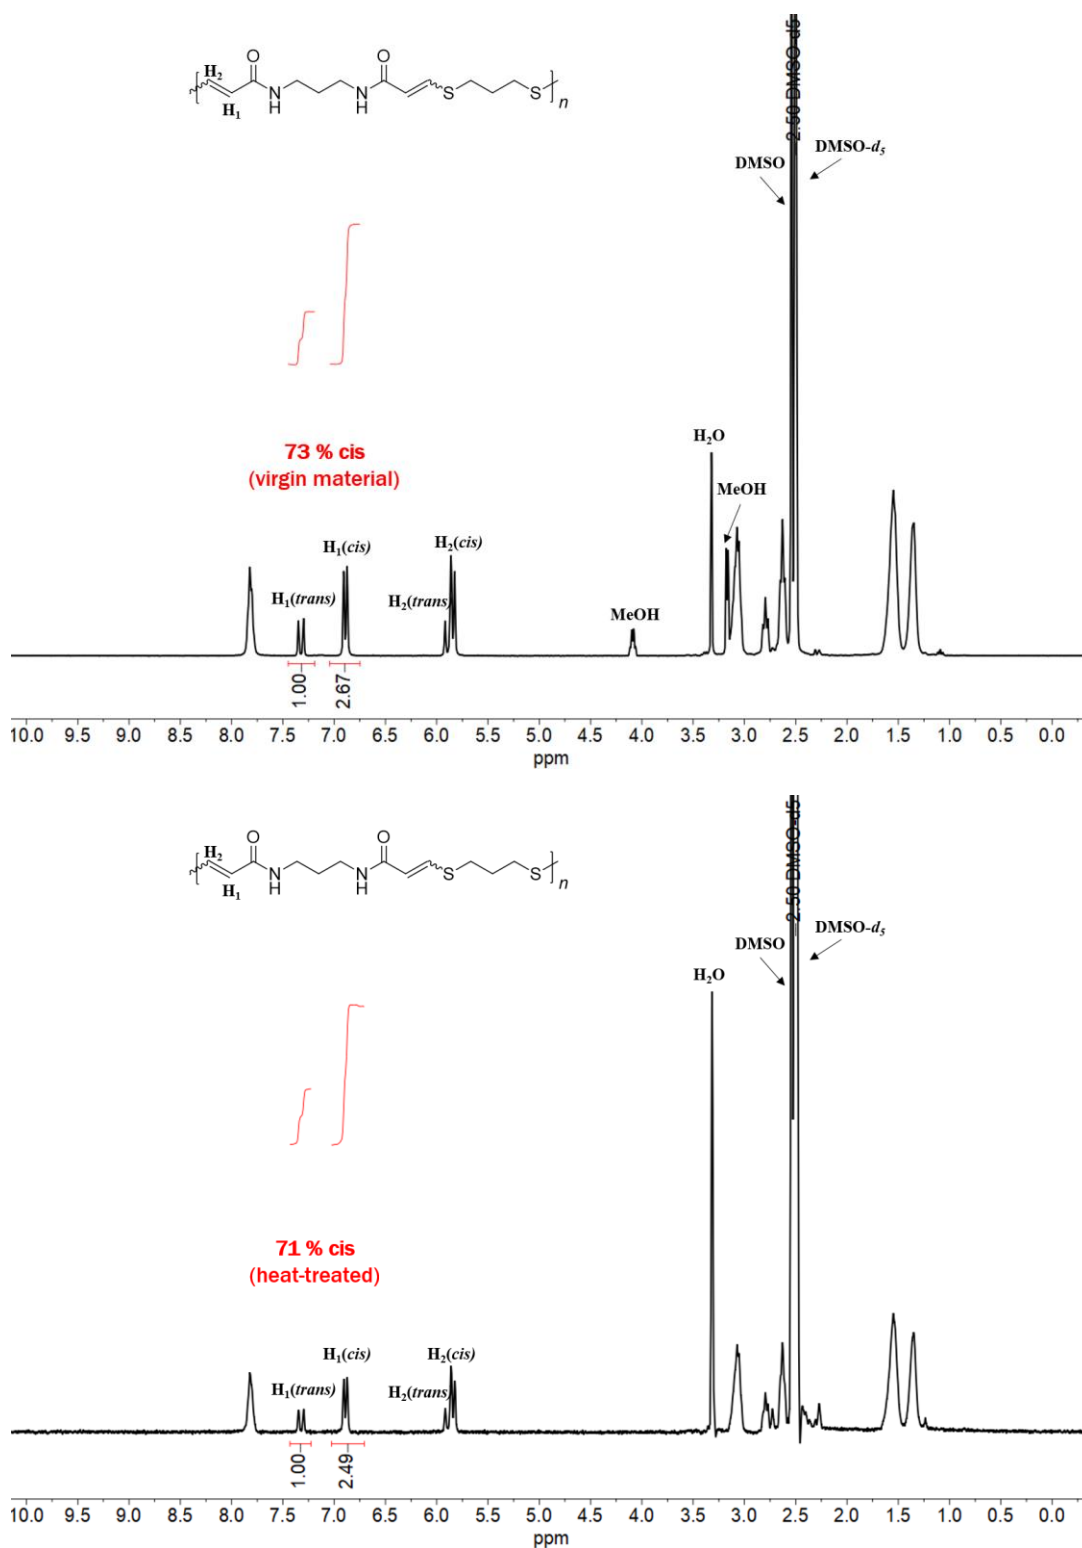

**Supplementary Figure 19.**  $^1\text{H}$  NMR spectroscopy (400 MHz,  $\text{DMSO-}d_6$ ) of as-synthesized & heat treated  $\text{C}_3\text{A-C}_6\text{T}$  indicating minimal isomerization of double bond. Top – as-synthesized polymer. Bottom – Polymer heated under  $\text{N}_2$  atmosphere at  $150^\circ\text{C}$ , 12 h.

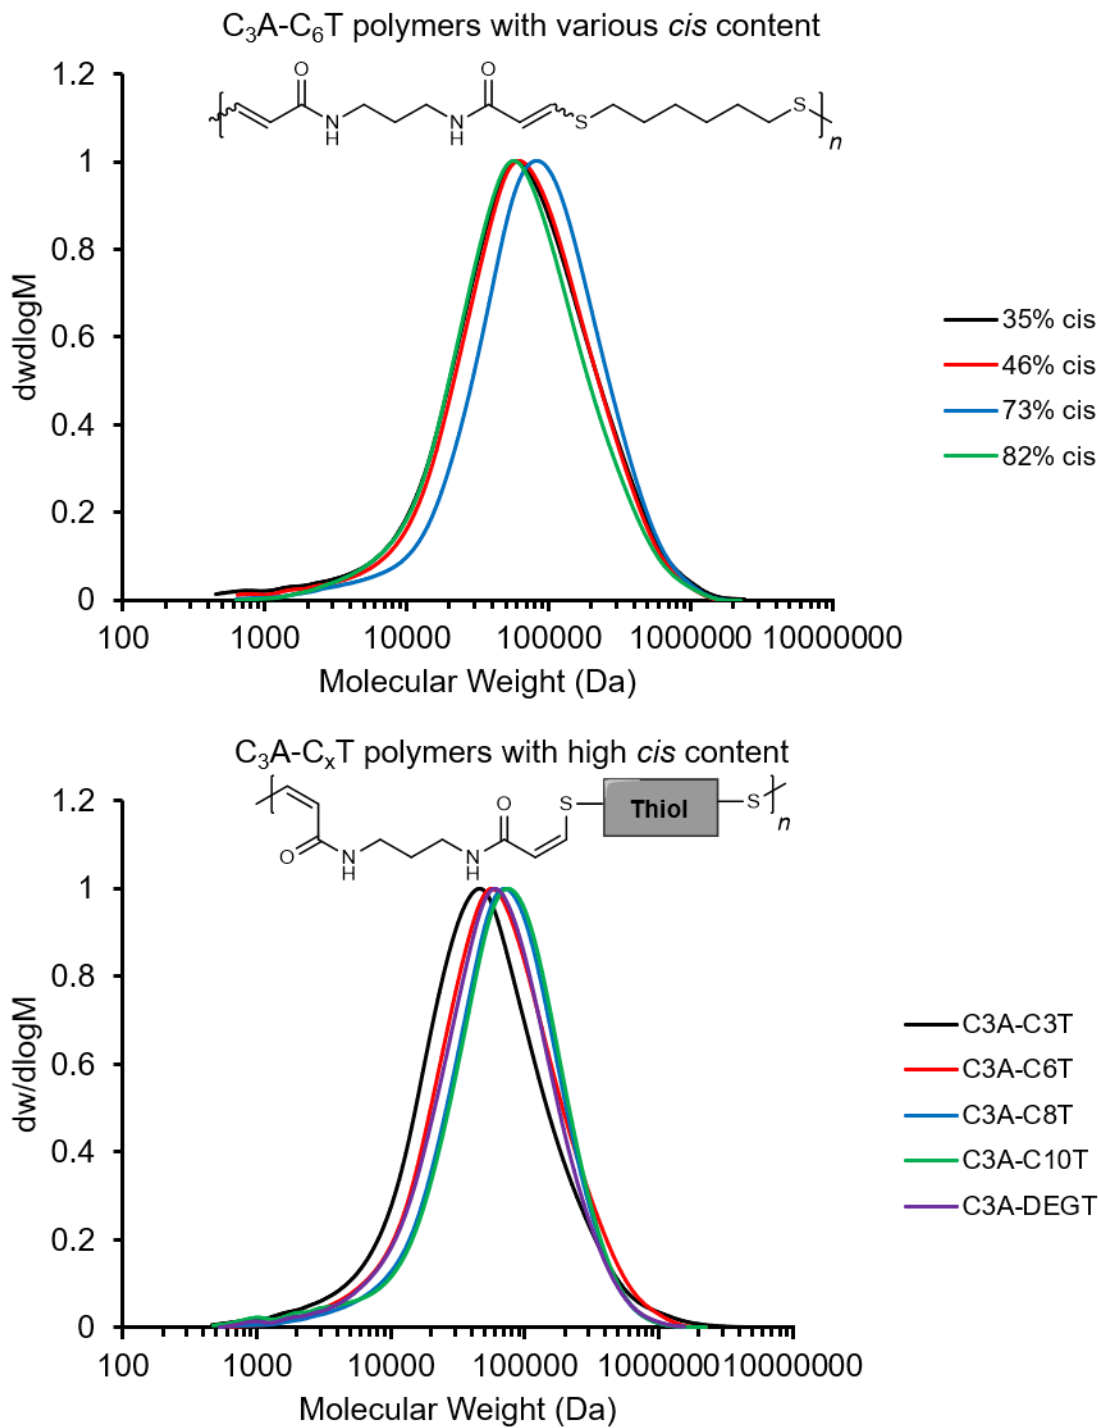

**Supplementary Figure 20.** Normalised size exclusion chromatogram of polyamides. Top – C<sub>3</sub>A-C<sub>6</sub>T variable *cis* content. Bottom – C<sub>3</sub>A with various thiol comonomers at high *cis* content.

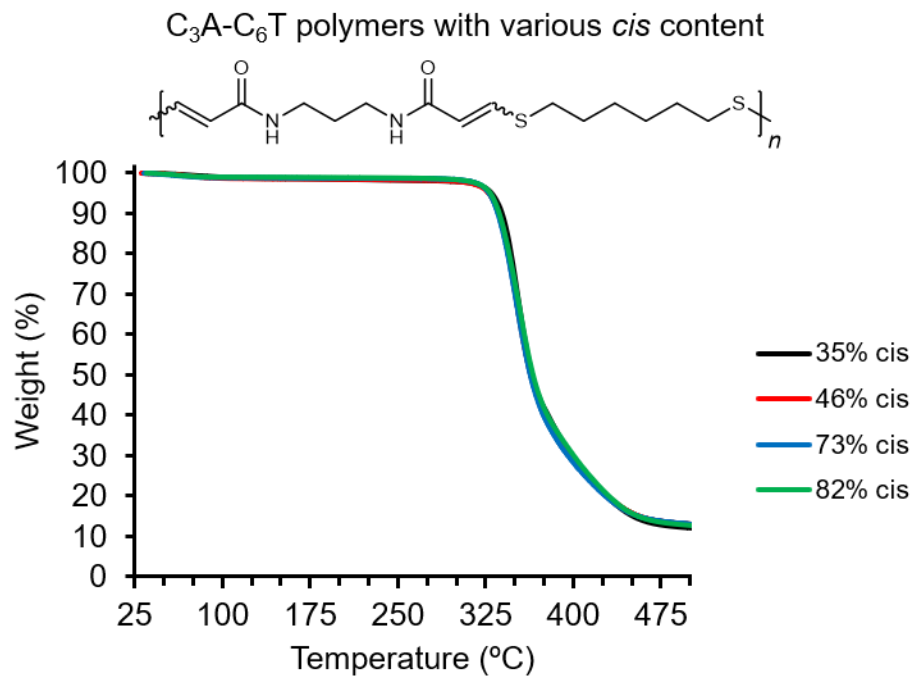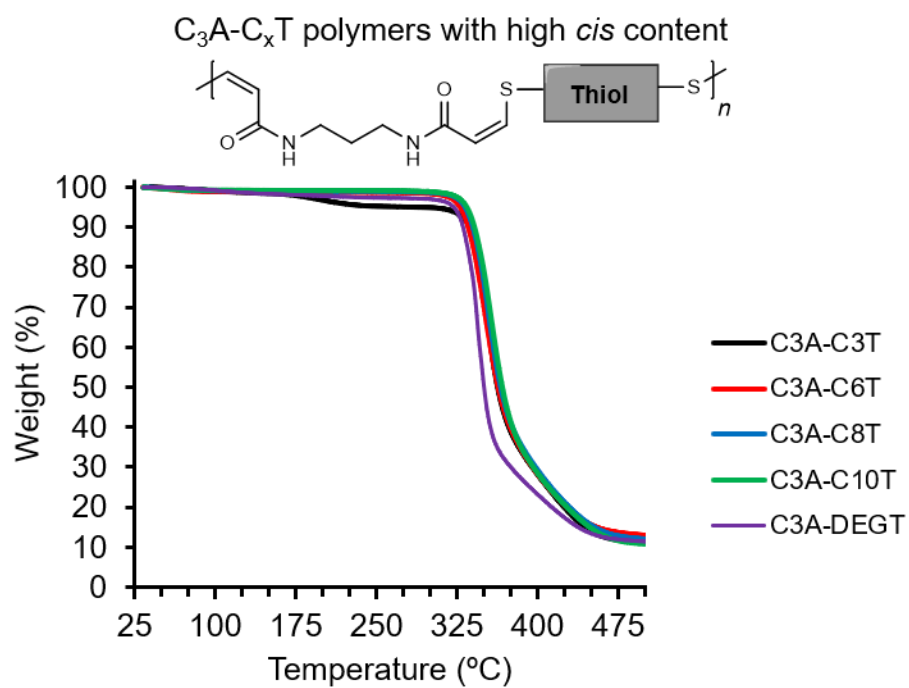

**Supplementary Figure 21.** TGA thermograms of polyamides. Top –  $C_3A-C_6T$  variable *cis* content. Bottom –  $C_3A$  with various thiol comonomers at high *cis* content.

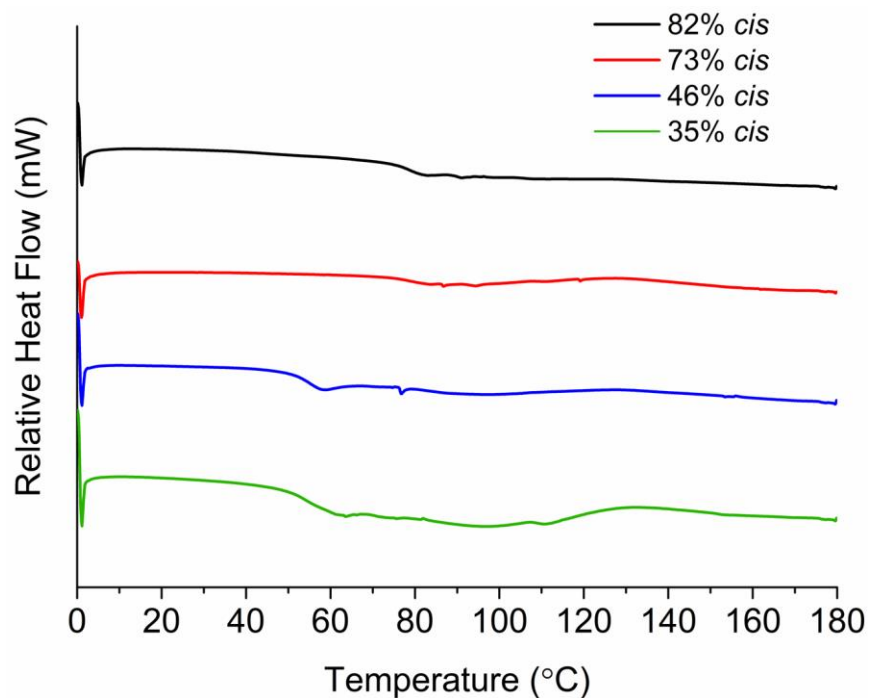

**Supplementary Figure 22.** DSC thermograms of 1<sup>st</sup> heating cycle for C<sub>3</sub>A-C<sub>6</sub>T with variable *cis* content.

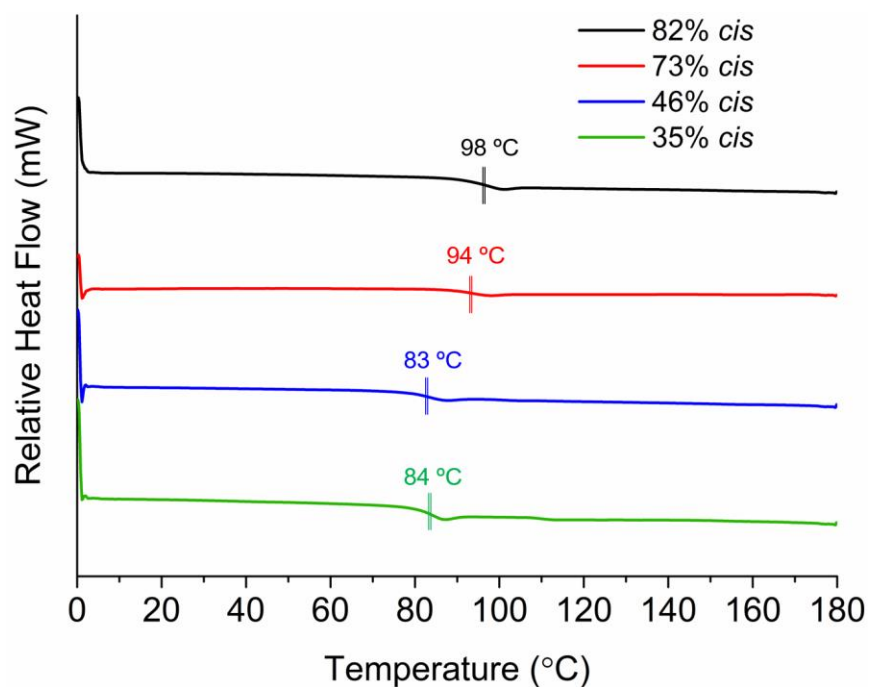

**Supplementary Figure 23.** DSC thermograms of 2<sup>nd</sup> heating cycle for C<sub>3</sub>A-C<sub>6</sub>T with variable *cis* content. Approximate position of  $T_g$  is indicated by vertical hashmark.



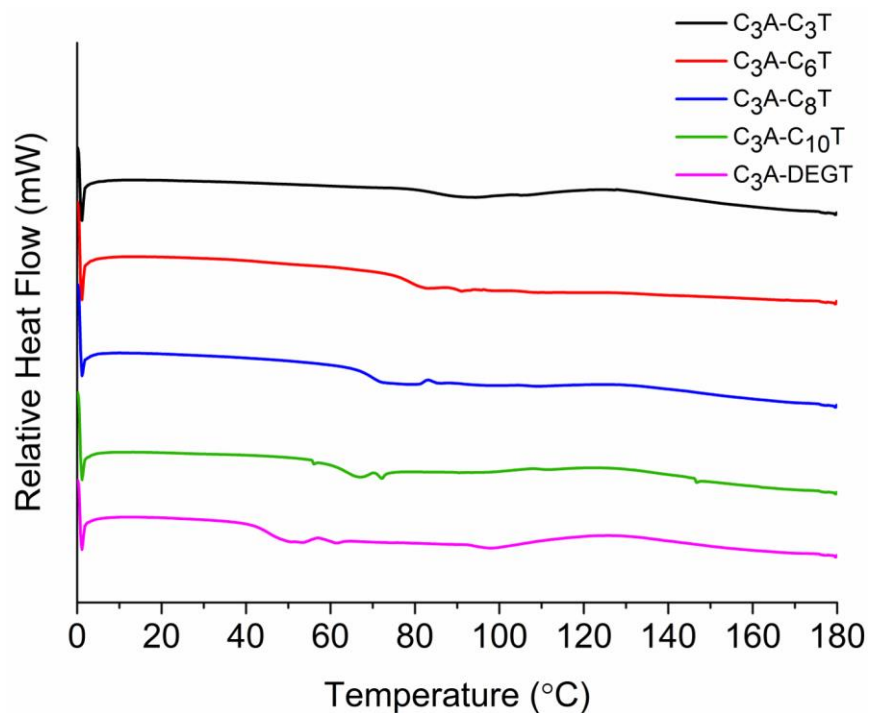

**Supplementary Figure 24.** DSC thermograms of 1<sup>st</sup> heating cycle for polyamides with high *cis* content.

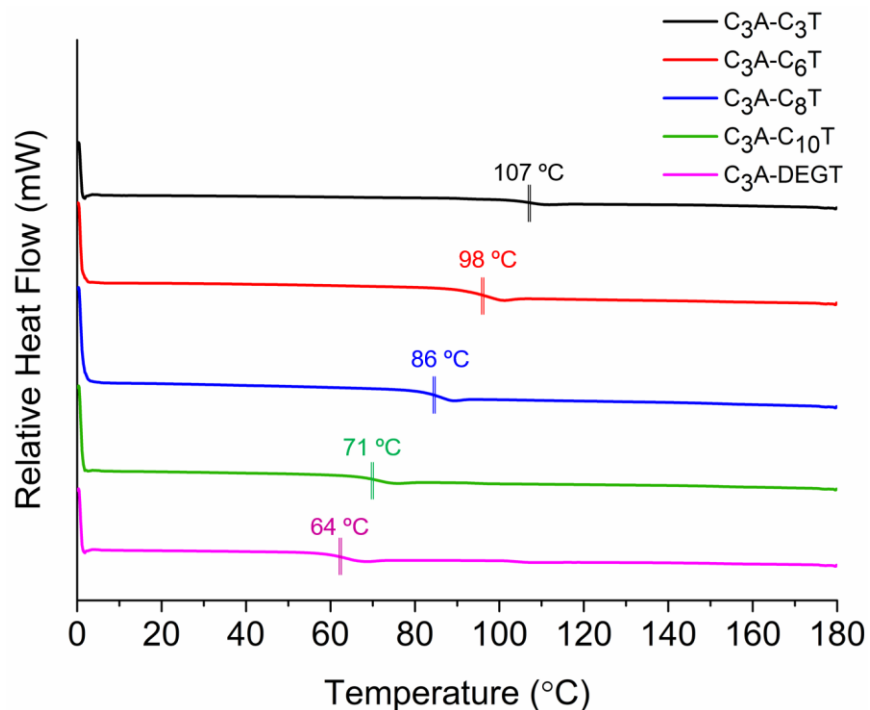

**Supplementary Figure 25.** DSC thermograms of 2<sup>nd</sup> heating cycle for polyamides with high *cis* content. Approximate position of  $T_g$  is indicated by vertical hashmark.

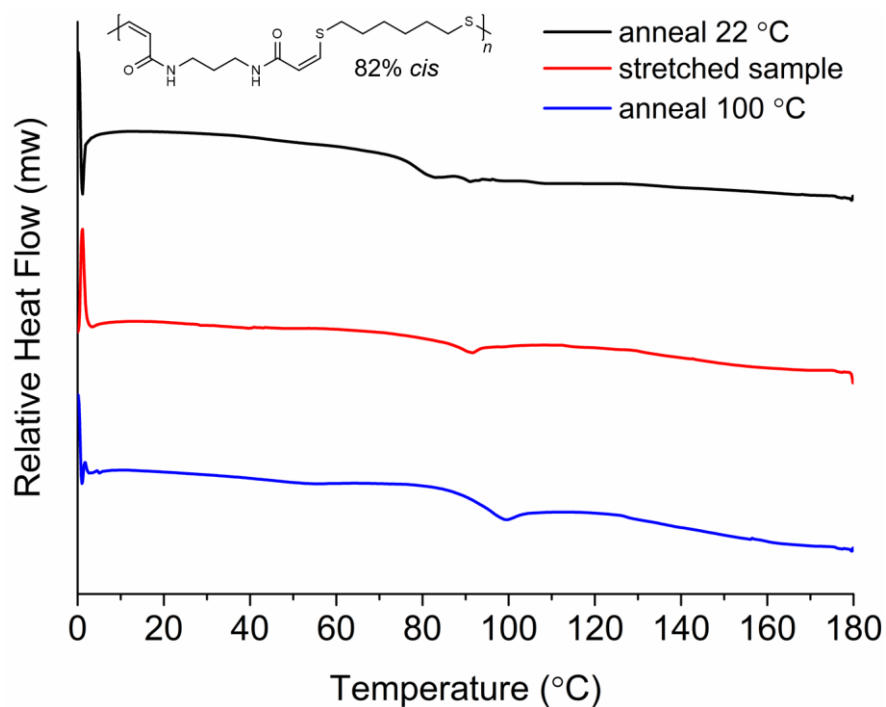

**Supplementary Figure 26.** DSC Thermograms of 1<sup>st</sup> heating cycle for three separate samples. Top – C<sub>3</sub>A-C<sub>6</sub>T 82% *cis*. Middle – after stretching sample to break (uniaxial tensile testing). Bottom – annealing for 12 h above the glass transition temperature of the polymer. No melt transitions were detected in any sample.

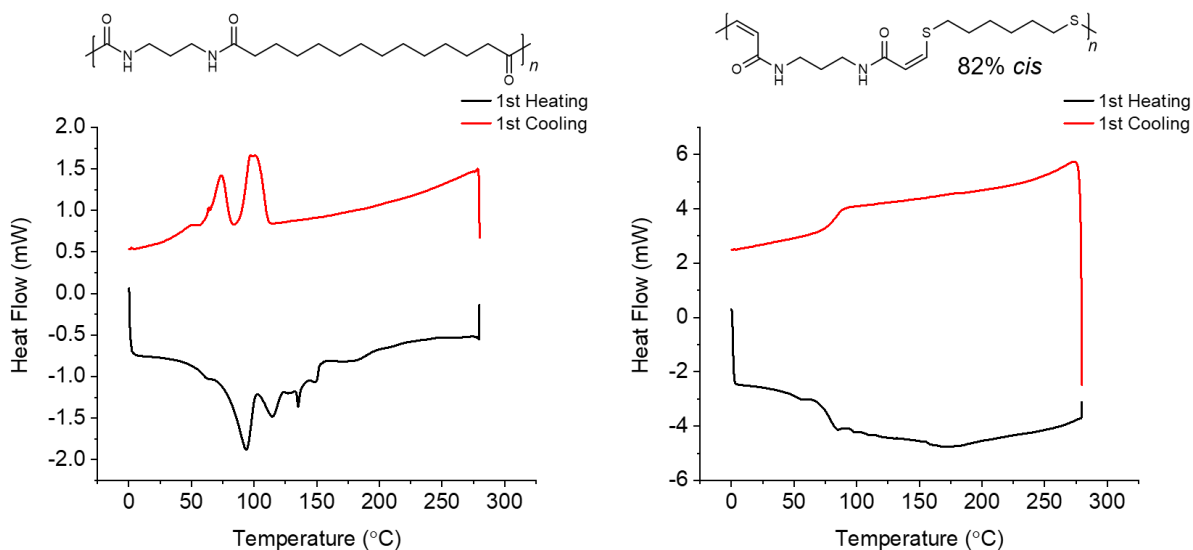

**Supplementary Figure 27.** DSC Thermograms of 1<sup>st</sup> heating/cooling cycle for Left – Nylon 3,14 and Right – C<sub>3</sub>A-C<sub>6</sub>T 82% *cis*. Nylon 3,14 was tested as-synthesised from the melt polycondensation of 1,3-diaminopropane and tetradecanedicarboxylic acid (200 °C, 200 mTorr vacuum).

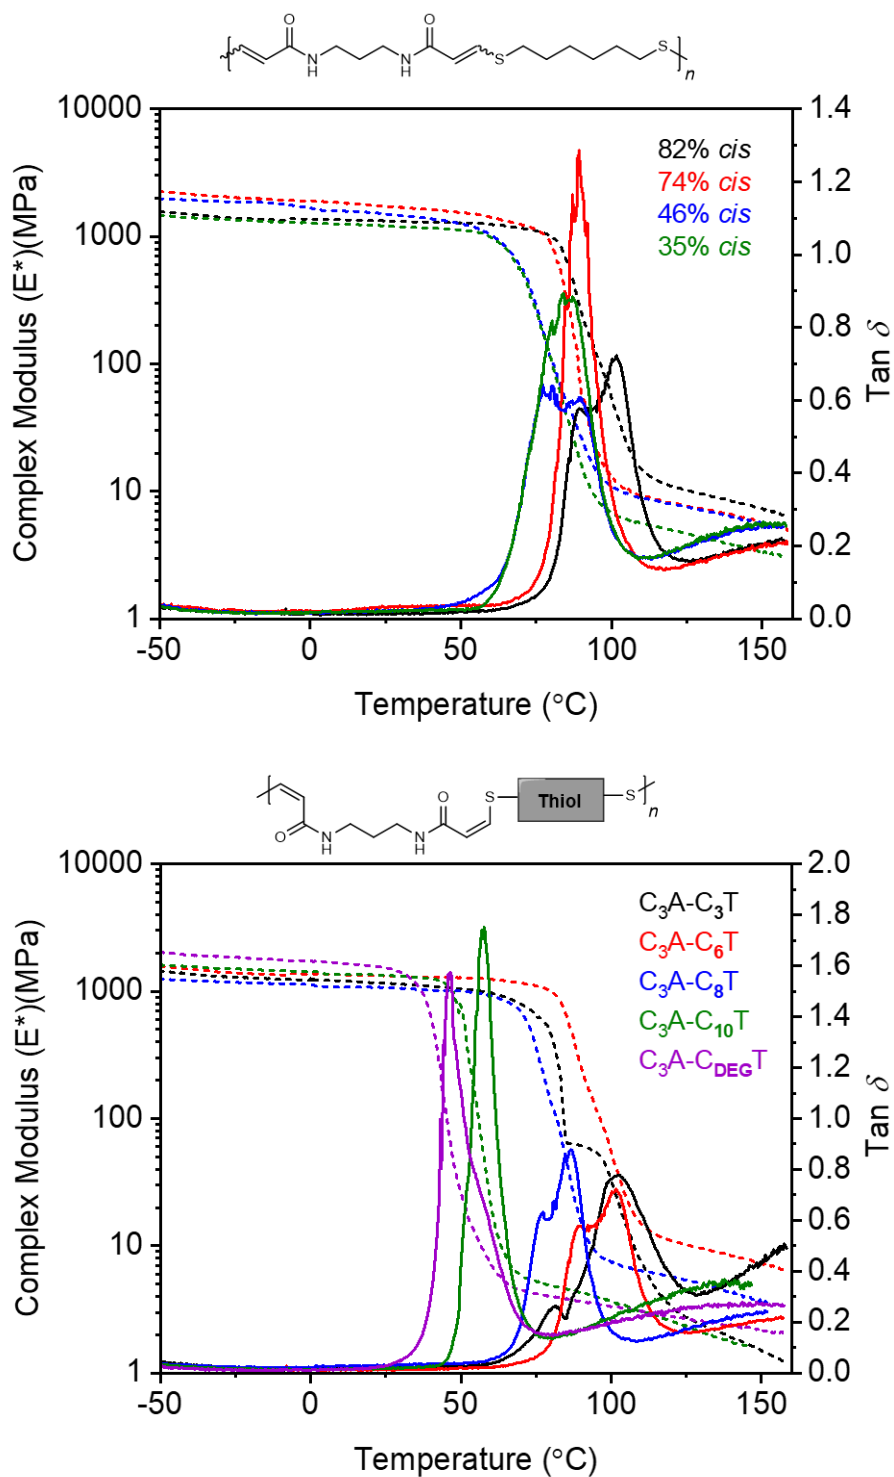

**Supplementary Figure 28.** Representative DMA for polyamides. Top –  $\text{C}_3\text{A-C}_6\text{T}$  with variable stereochemistry. Bottom –  $\text{C}_3\text{A}$  with different thiols and high *cis* content.

**Supplementary Table 1.** Shape memory behavior of C<sub>3</sub>A-C<sub>6</sub>T polymer samples with variable stereochemistry, examined using DMA. (n = 3)

| Sample                                                 | Strain Fixation | Strain Recovery (%) | Recovery Temperature (°C) |
|--------------------------------------------------------|-----------------|---------------------|---------------------------|
| C <sub>3</sub> A-C <sub>6</sub> T <sub>(37% cis)</sub> | 99 ± 2          | 100                 | 34 ± 3                    |
| C <sub>3</sub> A-C <sub>6</sub> T <sub>(46% cis)</sub> | 98 ± 4          | 100                 | 35 ± 4                    |
| C <sub>3</sub> A-C <sub>6</sub> T <sub>(73% cis)</sub> | 99 ± 1          | 100                 | 60 ± 2                    |
| C <sub>3</sub> A-C <sub>6</sub> T <sub>(82% cis)</sub> | 99 ± 2          | 100                 | 61 ± 2                    |

**Supplementary Table 2.** Shape memory behavior of C<sub>3</sub>A-C<sub>x</sub>T polymer samples with various thiols and high *cis* content, examined using DMA. (n = 3)

| Sample                                                  | Strain Fixation | Strain Recovery (%) | Recovery Temperature (°C) |
|---------------------------------------------------------|-----------------|---------------------|---------------------------|
| C <sub>3</sub> A-C <sub>3</sub> T <sub>(82% cis)</sub>  | 99 ± 1          | 100                 | 61 ± 1                    |
| C <sub>3</sub> A-C <sub>6</sub> T <sub>(82% cis)</sub>  | 99 ± 2          | 100                 | 61 ± 2                    |
| C <sub>3</sub> A-C <sub>8</sub> T <sub>(79% cis)</sub>  | 99 ± 1          | 100                 | 61 ± 3                    |
| C <sub>3</sub> A-C <sub>10</sub> T <sub>(77% cis)</sub> | 99 ± 2          | 100                 | 45 ± 1                    |
| C <sub>3</sub> A-C <sub>DEGT</sub> <sub>(78% cis)</sub> | 99 ± 1          | 100                 | 35 ± 5                    |

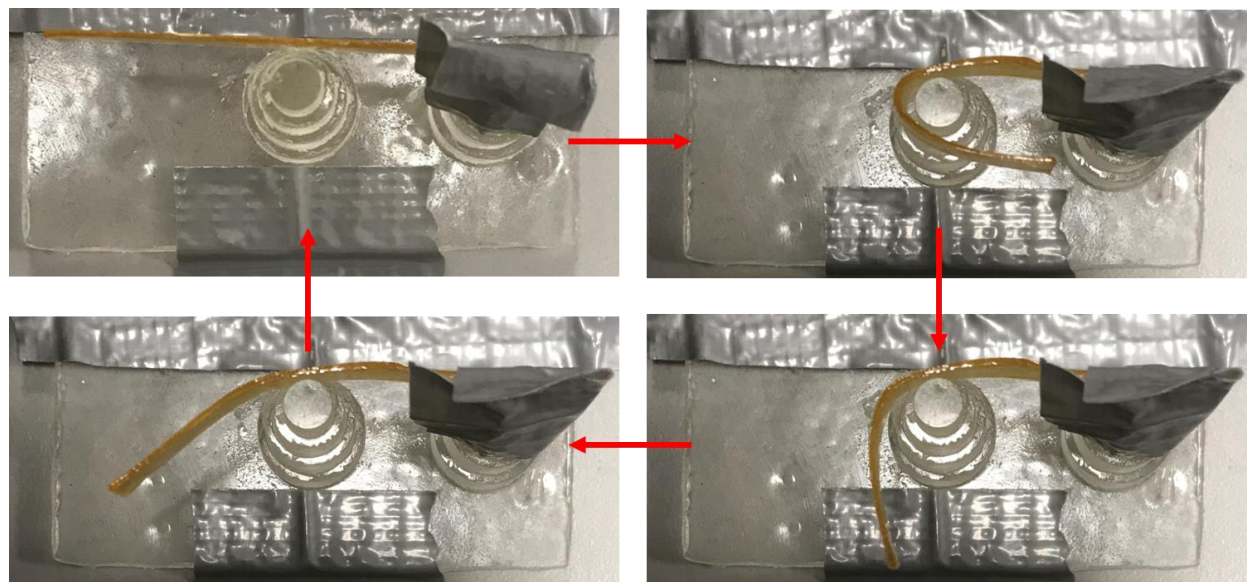

**Supplementary Figure 29.** Experimental set-up for cyclic shape memory testing with 1 cycle shown for reference.

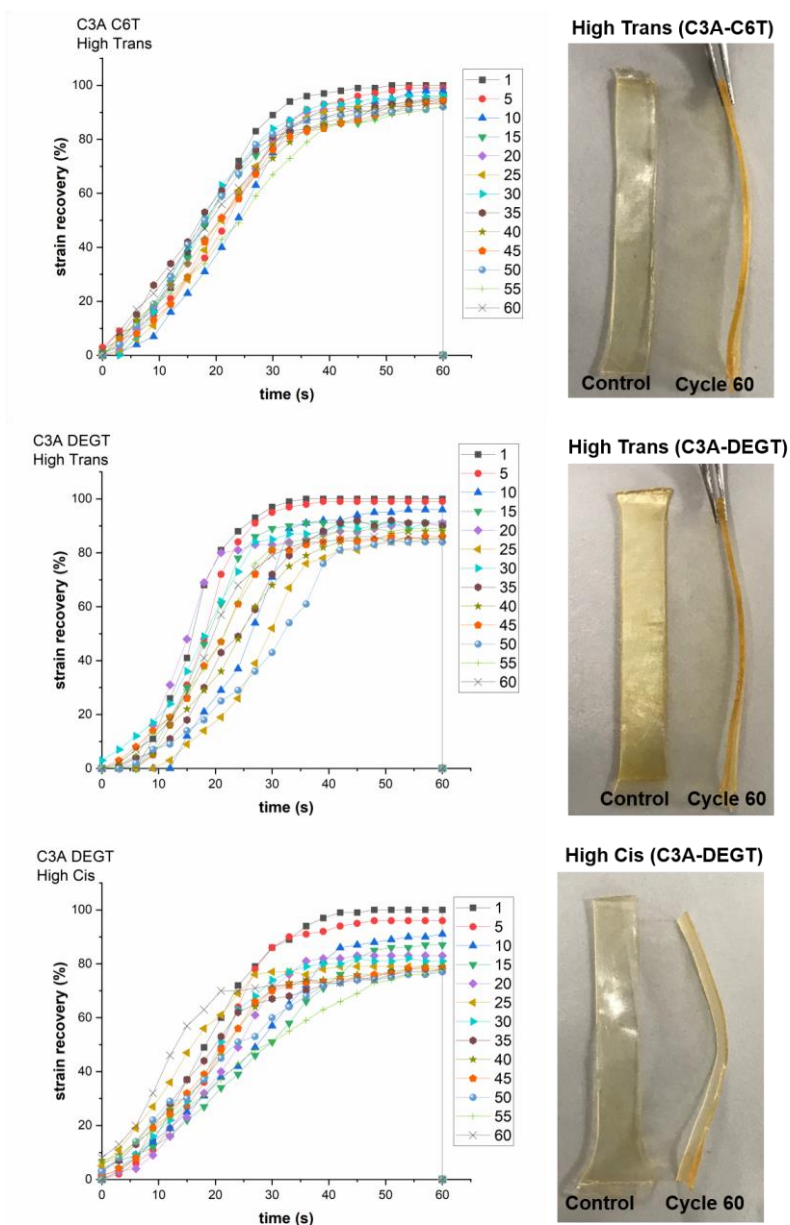

**Supplementary Figure 30.** Cyclic shape memory (60 cycles) for various polyamides. The data is plotted every 5 cycles for clarity.

**Supplementary Table 3.** Strain recovery of polyamides for cyclic shape memory. (60 cycles,  $n = 3$ )

| Cycle | C <sub>3</sub> A-C <sub>6</sub> T high trans | C <sub>3</sub> A-C <sub>DEGT</sub> high trans | C <sub>3</sub> A-C <sub>DEGT</sub> high cis |
|-------|----------------------------------------------|-----------------------------------------------|---------------------------------------------|
| 1     | 100 ± 0                                      | 99 ± 1                                        | 100 ± 0                                     |
| 20    | 95 ± 2                                       | 91 ± 5                                        | 83 ± 6                                      |
| 40    | 95 ± 4                                       | 88 ± 3                                        | 79 ± 4                                      |
| 60    | 93 ± 3                                       | 85 ± 4                                        | 78 ± 5                                      |

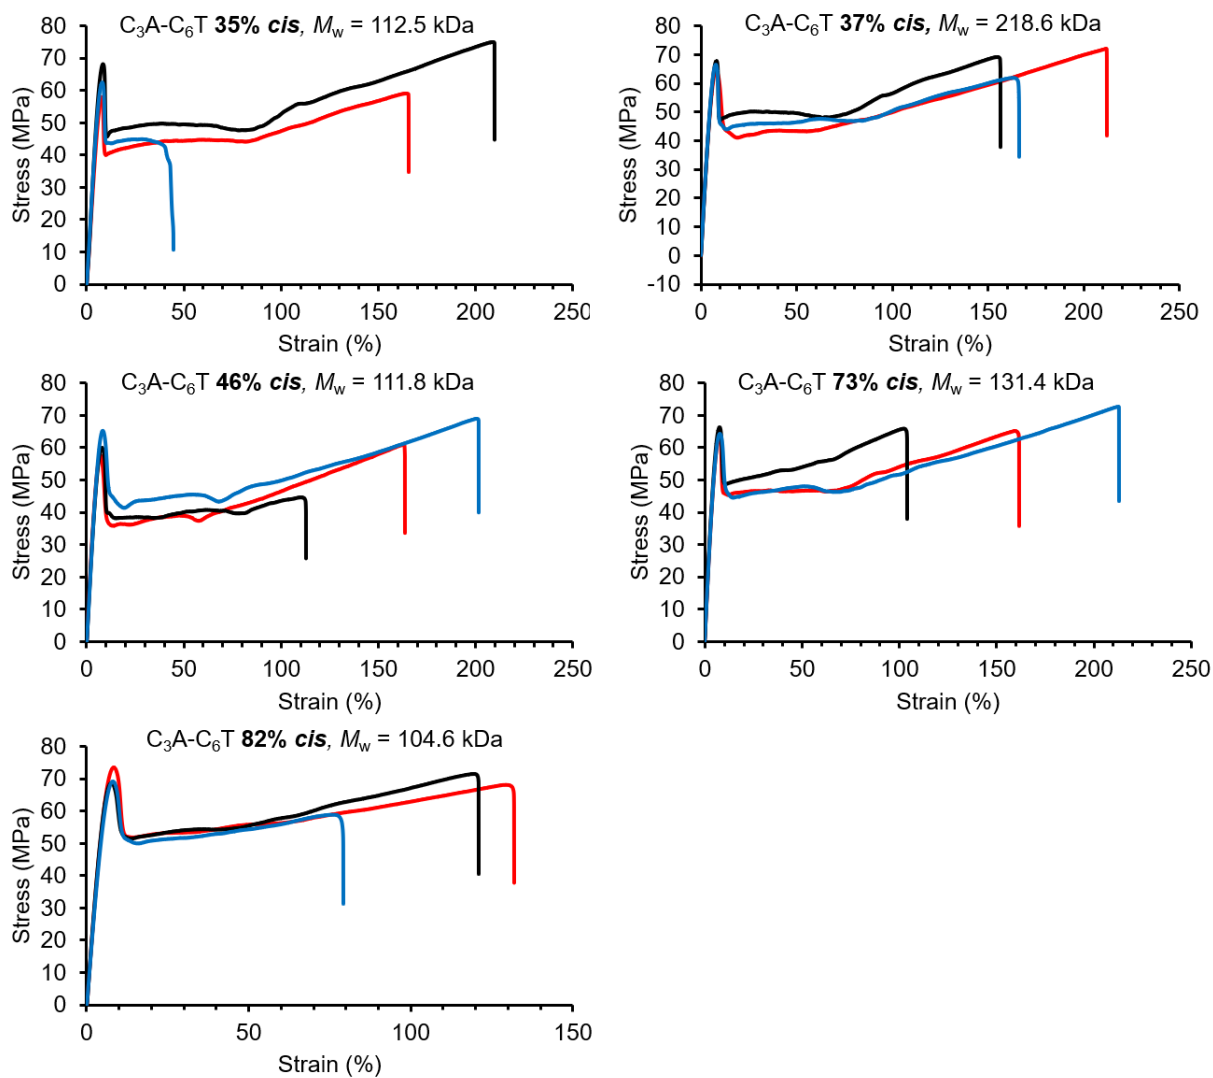

**Supplementary Figure 31.** Stress vs strain curves of  $C_3A-C_6T$  polymers with variable *cis* content tested at  $10 \text{ mm min}^{-1}$  strain rate. Summary of results are shown in Supplementary Table 4.

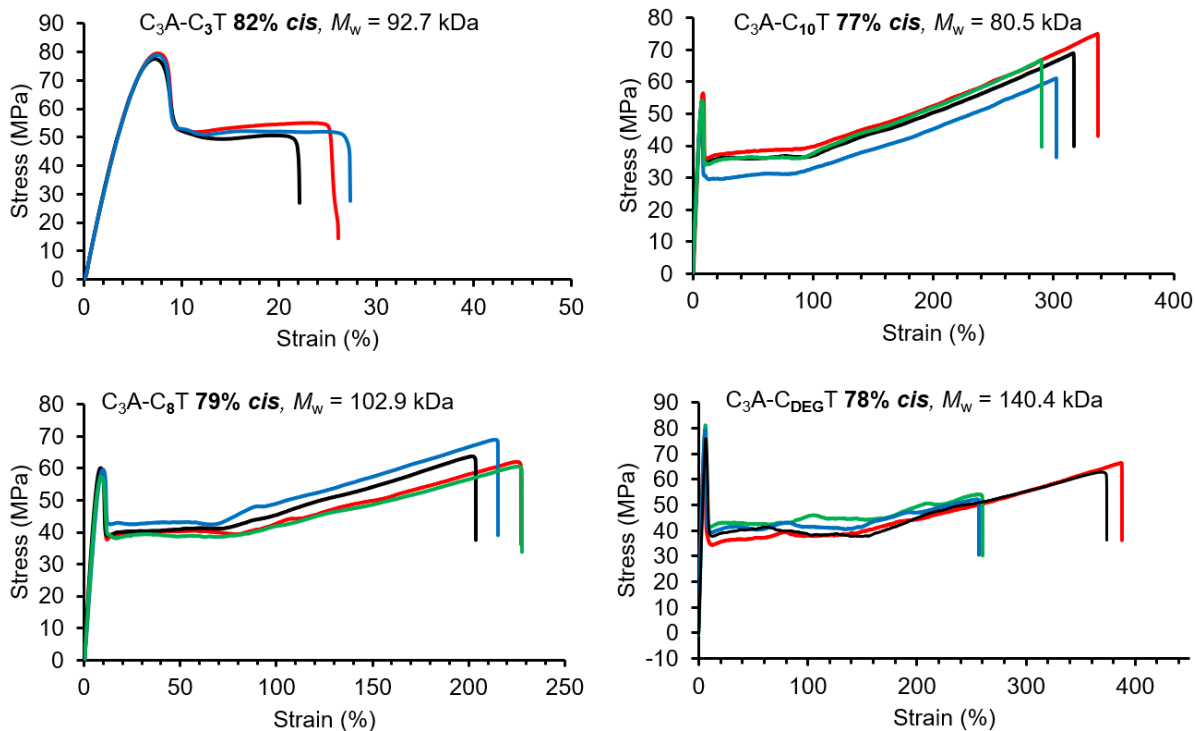

**Supplementary Figure 32.** Stress vs strain curves of C<sub>3</sub>A-C<sub>x</sub>T polymers (thiol variation) with high *cis* content tested at 10 mm min<sup>-1</sup> strain rate. Summary of results are shown in Supplementary Table 4.

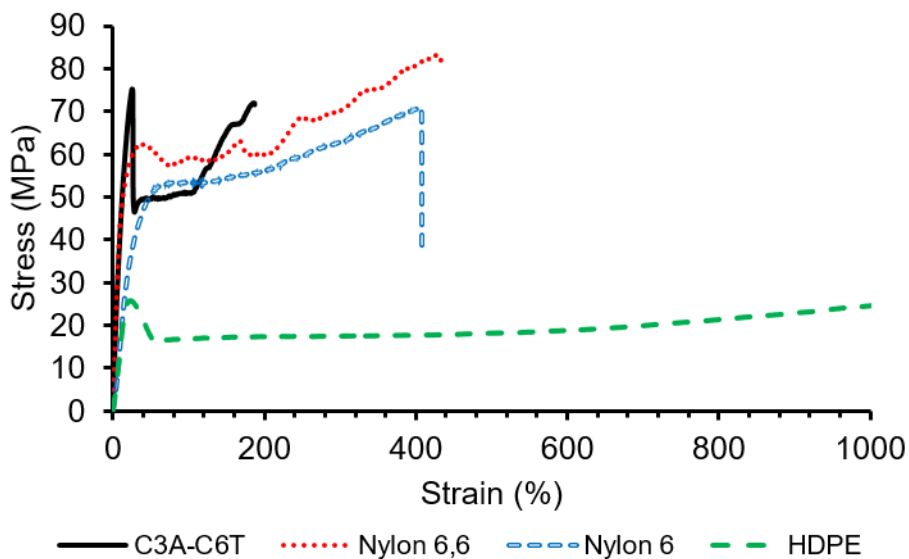

**Supplementary Figure 33.** Representative stress vs strain curves of C<sub>3</sub>A-C<sub>6</sub>T 82% *cis*, Nylon 6, Nylon 6,6, and HDPE tested at 22 °C at 10 mm min<sup>-1</sup> strain rate. (n ≥ 2)

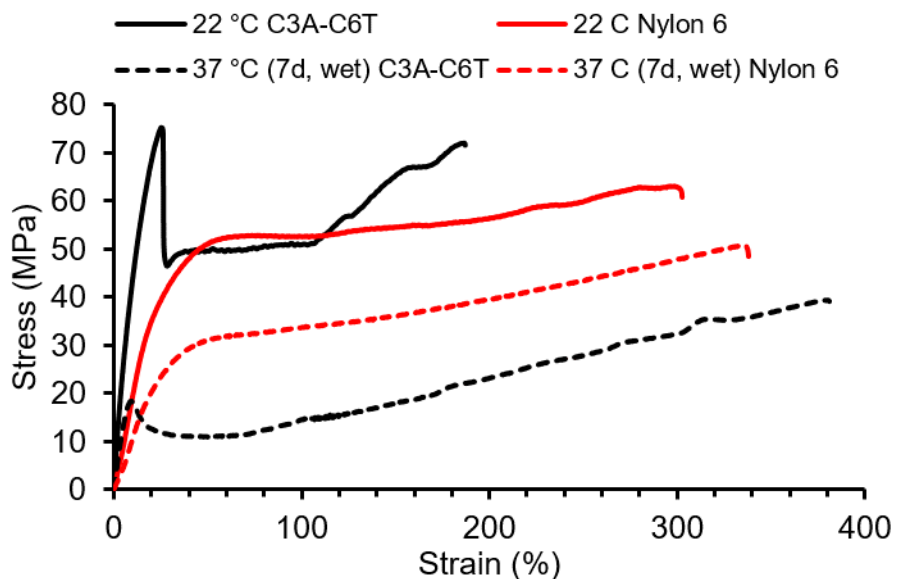

**Supplementary Figure 34.** Stress vs strain curves of C<sub>3</sub>A-C<sub>6</sub>T 82% *cis*, and Nylon 6 tested at 22 °C and after immersion in PBS solution for 7 d at 37 °C. Testing was performed at 37 °C in order to mimic biological conditions and at 10 mm min<sup>-1</sup> strain rate. (n = 1 for each sample)

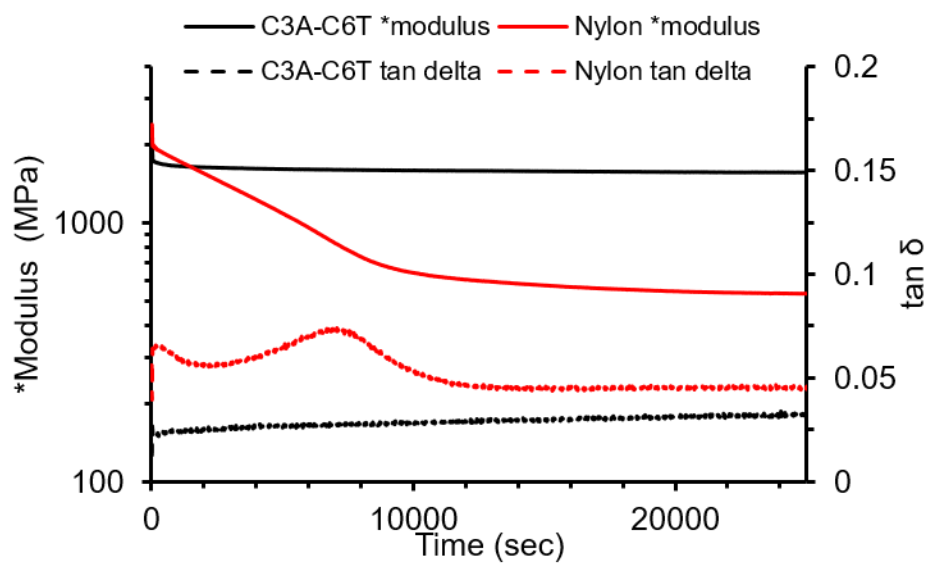

**Supplementary Figure 35.** Representative DMA of C<sub>3</sub>A-C<sub>6</sub>T 82% *cis* and Nylon 6 immersed in water at 37 °C. (n = 3 for each sample)



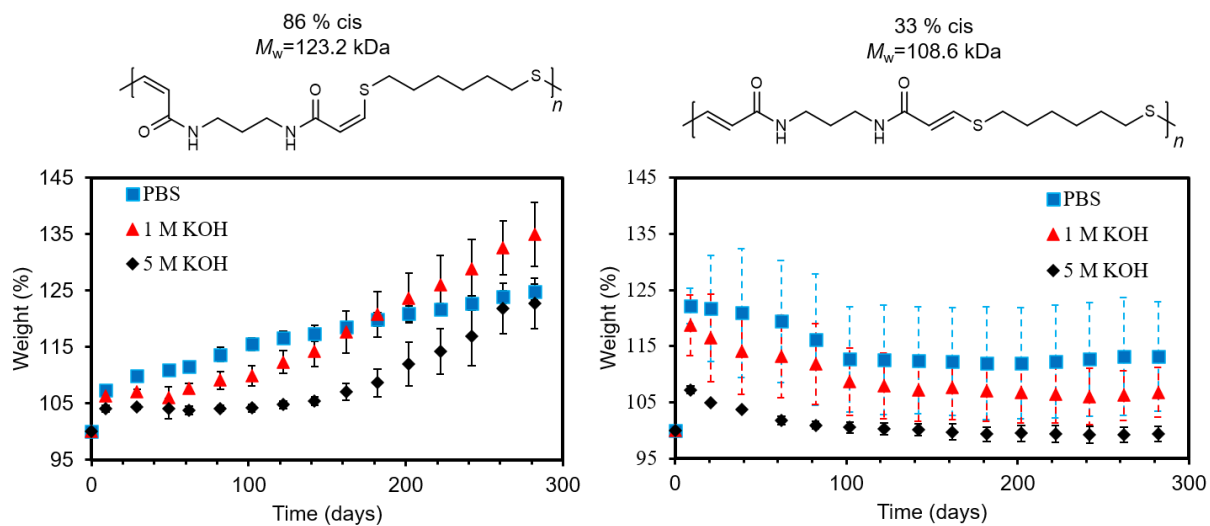

**Supplementary Figure 36.** Degradation experiments for C<sub>3</sub>A-C<sub>6</sub>T polymers (high *cis* & high *trans*) by aqueous immersion at 37 °C with periodic weight measurements. Error bars represent 1 s.d. (n = 3 for each polymer in each solution)

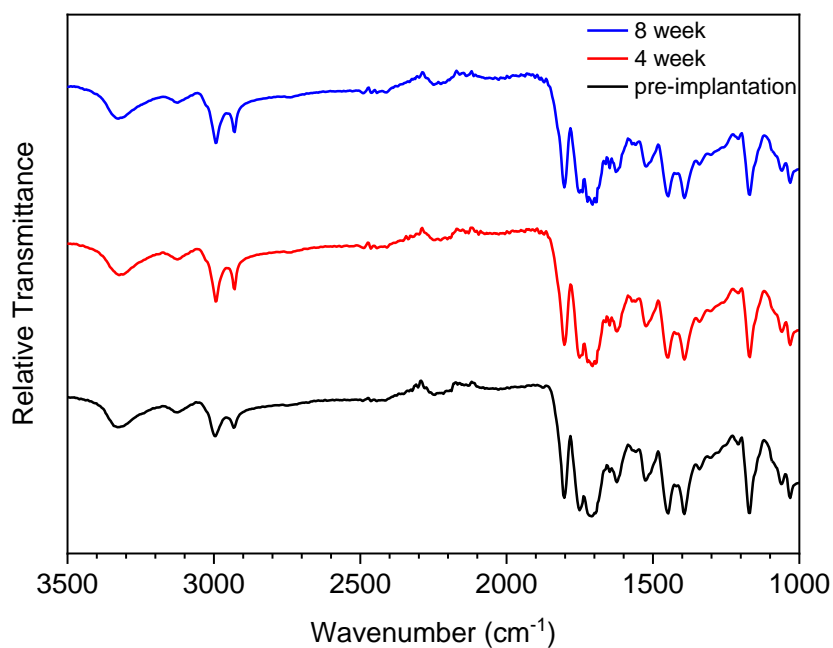

**Supplementary Figure 37.** IR spectra for C<sub>3</sub>A-C<sub>6</sub>T (82% *cis*) before implantation, 4-week implantation, and 8-week implantation.

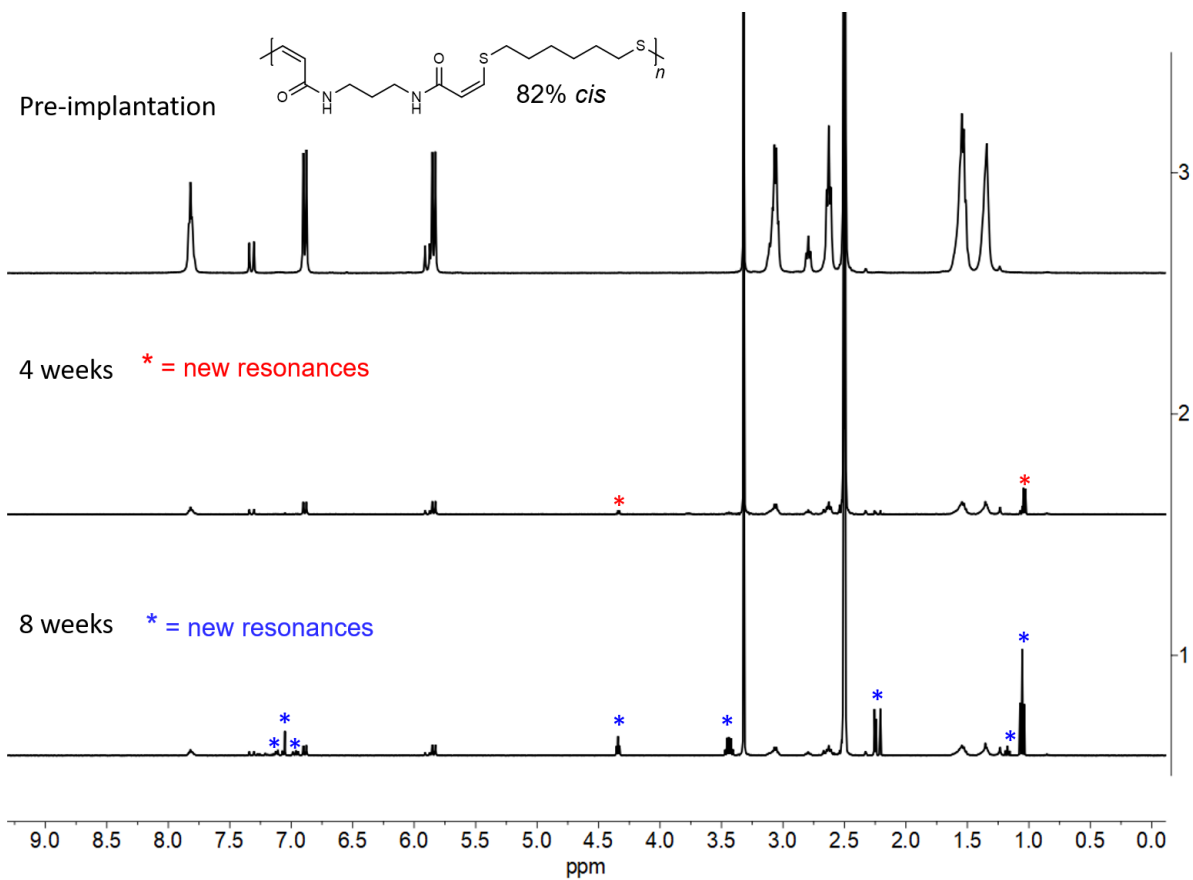

**Supplementary Figure 38.**  $^1\text{H}$  NMR spectra for C<sub>3</sub>A-C<sub>6</sub>T (82% *cis*) before implantation, 4-week implantation, and 8-week implantation. New resonances are indicated with (\*) for each time point.

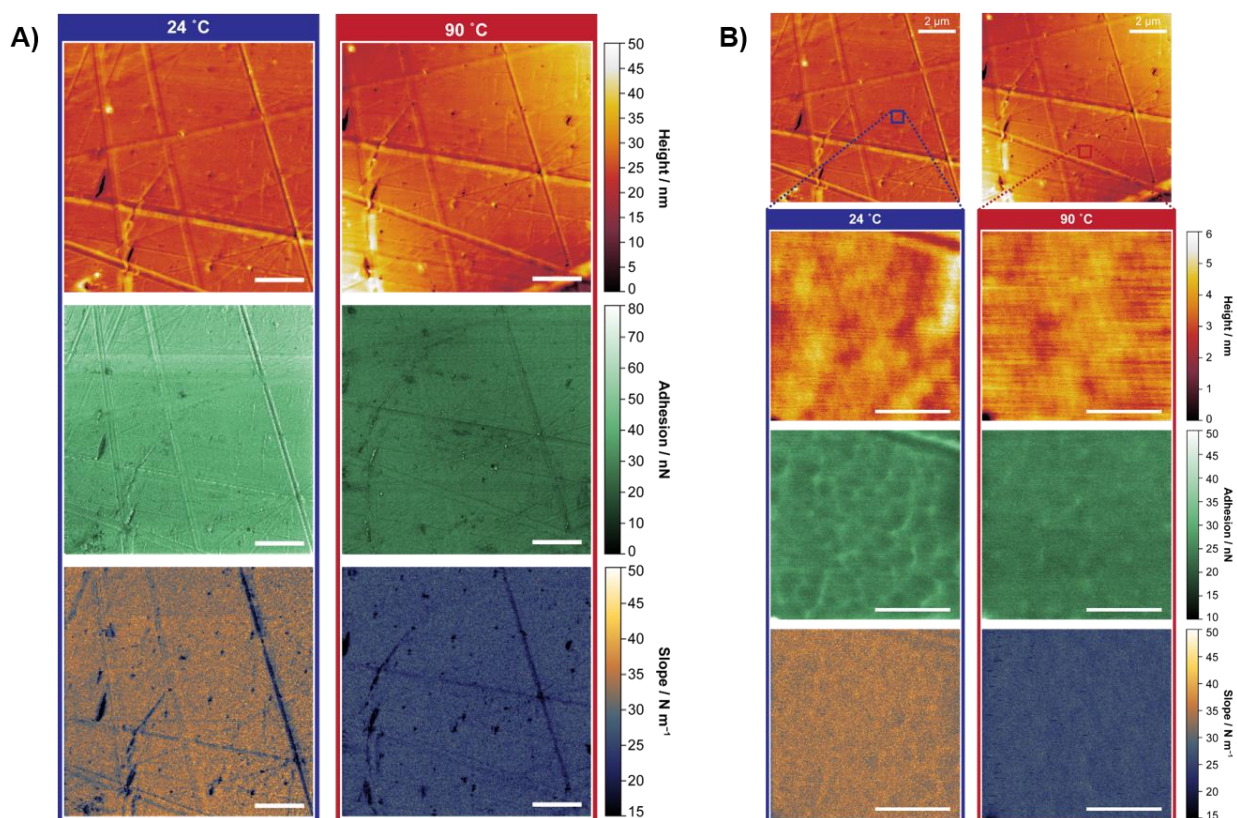

**Supplementary Figure 39.** C<sub>3</sub>A-C<sub>6</sub>T (82% *cis*) AFM analysis. A) Low resolution AFM images of the same area of a sample at temperatures below (24 °C, left hand column) and above (90 °C, right hand column) the  $T_g$  of the polymer. The height images (top row) show only small differences, probably due to slight heat deformation of the polymer. Increasing the temperature had only a minimal effect on the interaction of the AFM tip with the sample (adhesion, middle row), but a significant effect on the material's hardness (slope, bottom row): at higher temperatures, the material softened as expected. There were no visible changes in microstructure after heating, suggesting the absence of phase separation at this length scale. Scale bars = 2 μm. B) Higher resolution AFM images of the areas indicated in the 10 μm scans (A). As before, no significant morphological changes were observed with increasing temperature, but the material did become softer, as evidenced by the differences in the slope images (bottom row). Scale bars = 0.2 μm unless otherwise stated. Note that the colour scale used for the 10 μm height images is the same for both images. Also, the  $T_g$  decreases (*ca.* 70 – 80 °C) as the sample is aged under ambient (10 d for this sample) conditions and this is likely due to plasticization from water absorption. Refer to 1<sup>st</sup> run DSC data (Supplementary Figure 22 – Top). This is the reason the sample was heated to 90 °C and no significant differences were observed at 105 °C.

**Supplementary Table 4.** Physical, thermal and mechanical properties for polyamides with varied compositions.

| Sample                                               | <sup>a</sup> % <i>cis</i> | <sup>b</sup> <i>M</i> <sub>w</sub><br>(kg mol <sup>-1</sup> ) | <i>D</i> <sub>M</sub> | <sup>c</sup> <i>T</i> <sub>g</sub><br>(DSC) | <i>T</i> <sub>d</sub><br>(5% loss) | <sup>d</sup> Modulus<br>(MPa) | Yield Stress<br>(MPa) | Strain at<br>break (%) | Stress at break<br>(MPa) |
|------------------------------------------------------|---------------------------|---------------------------------------------------------------|-----------------------|---------------------------------------------|------------------------------------|-------------------------------|-----------------------|------------------------|--------------------------|
| C <sub>3</sub> A-C <sub>DEG</sub> T <sub>(cis)</sub> | 78                        | 140.4                                                         | 3.84                  | 64                                          | 334                                | 1623.7 ± 77.0                 | 78.1 ± 2.4            | 318 ± 70               | 58.8 ± 7.0               |
| C <sub>3</sub> A-C <sub>10</sub> T <sub>(cis)</sub>  | 78                        | 80.5                                                          | 2.77                  | 71                                          | 334                                | 927.7 ± 26.7                  | 54.7 ± 1.1            | 313 ± 19               | 69.4 ± 3.7               |
| C <sub>3</sub> A-C <sub>8</sub> T <sub>(cis)</sub>   | 79                        | 102.9                                                         | 2.94                  | 86                                          | 333                                | 939.2 ± 67.0                  | 59.2 ± 1.2            | 217 ± 11               | 63.7 ± 3.7               |
| C <sub>3</sub> A-C <sub>6</sub> T <sub>(cis)</sub>   | 82                        | 104.6                                                         | 3.35                  | 98                                          | 334                                | 1278.4 ± 42.1                 | 70.4 ± 2.6            | 109 ± 28               | 65.9 ± 6.6               |
| C <sub>3</sub> A-C <sub>6</sub> T <sub>(73)</sub>    | 73                        | 131.4                                                         | 3.39                  | 94                                          | 327                                | 1219.3 ± 48.0                 | 64.7 ± 1.5            | 158 ± 55               | 67.9 ± 4.2               |
| C <sub>3</sub> A-C <sub>6</sub> T <sub>(46)</sub>    | 46                        | 111.8                                                         | 3.84                  | 83                                          | 328                                | 1111.7 ± 19.6                 | 60.9 ± 3.9            | 158 ± 45               | 58.1 ± 12.4              |
| C <sub>3</sub> A-C <sub>6</sub> T <sub>(35)</sub>    | 35                        | 112.5                                                         | 4.7                   | 84                                          | 338                                | 1052.5 ± 74.2                 | 62.9 ± 5.1            | 138 ± 87               | 58.8 ± 16.3              |
| C <sub>3</sub> A-C <sub>3</sub> T <sub>(cis)</sub>   | 82                        | 92.7                                                          | 4.31                  | 107                                         | 287                                | 1547.8 ± 44.4                 | 78.6 ± 1.1            | 24 ± 3                 | 51.5 ± 2.7               |

<sup>a</sup>% *Cis* content determined by <sup>1</sup>H NMR analysis. <sup>b</sup>*M*<sub>w</sub> determined by SEC (DMF, 0.5 % w/w NH<sub>4</sub>BF<sub>4</sub>) analysis against poly(methyl methacrylate) (PMMA) standards. <sup>c</sup>*T*<sub>g</sub> was determined from the second heating cycle.

<sup>d</sup>Mechanical data were determined by tensile testing of independent samples (n ≥ 3).
